# Supplementary material for: Microhomologies are prevalent at Cas9-induced larger deletions
Source: PubMed Central journal article supplement (PMC6698657; doi:10.1093/nar/gkz459), 2019-05-25
Supplement: gkz459_supplemental_files.pdf [file gkz459_supplemental_files.pdf]

## Supplementary Figure and Table legends

### Supplementary Figure 1 – Overview of genome editing in mouse embryonic stem cells

A) Protocol schematic for mESC gene-editing, colony-picking, genotyping, and expansion. B) An example short-range PCR genotyping gel result from one experiment targeting Site 1 in mESCs with CRISPR/Cas9<sup>D10A</sup> nickases. The wildtype amplicon size is 2 kb, and the knockout amplicon size is 500 bp. C) Genotype frequencies from three independent experiments at each Site 1-3 determined by short-range PCR screening. D) Average genotyping results from all of the three experiments at Sites 1-3. E) Example Sanger sequencing traces from PCR products amplified from clones that were identified as homozygous knock-out clones with short-range PCR. A typical 'clean trace' read (top trace) and 'mixed trace' read (bottom trace) are shown for comparison. The site of the beginning of the 'mixed trace' is indicated with a red arrow head.

### Supplementary Figure 2 – Larger deletions are generated in a variety of genome-editing contexts

A) Schematic of CRISPR/Cas9<sup>D10A</sup> nickase strategy to delete Site 1 on chromosome 16 showing the positions of short-range PCR primers (SR, blue), medium-range PCR primers (MR, black), sgRNAs (red boxes), and LDs from E14-TG2a mESCs (E14, light blue dashed lines) and 416B cells (dark red dashed lines). Gel images showing PCR amplification products from gDNA harvested from a pool of transfected/electroporated cells. Site 1 was targeted in E14-TG2a mESCs that had not previously undergone CRISPR/Cas9 editing and in the 416B haematopoietic progenitor cell line. Left gel images correspond to short-range primers and right gel images correspond to medium-range primers. Wt and a grey line next to the gel image indicates the size of the wild type allele, KO and a black line indicates the size of alleles harbouring the expected deletion, and LDs and a red line indicates the size of alleles identified harbouring LDs. B) Site 7 Cas9 nuclease and 1x sgRNA targeting strategy. The sgRNA included in the 1x sgRNA transfection is shown in red. LD alleles amplified from pools of targeted cells are shown as light green dashed lines. Gel images showing PCR amplification products from pools of cells targeted using the indicated number of sgRNAs. Amplification from a pool of cells targeted with 2x sgRNA (in a separate experiment) is shown for comparison. Both the sgRNAs marked in grey and red were included in the 2x sgRNA experiment.

### Supplementary Figure 3 – Larger deletions identified when genome editing *in vivo* in mouse zygotes

Locus maps of CRISPR/Cas9 strategies to delete Sites 14-16 in mouse embryos, corresponding to the genes *Elavl4*, *Scn11a*, and *Trpm2*, respectively. Schematics show the positions of short-range PCR primers (SR, blue), sgRNAs (red boxes), and larger deletions (green lines). Copy counting ddPCR amplicons are indicated as purple lines. ddPCR amplicons were designed against the wildtype sequence at the critical region to identify loss of the allele (CR-LOA) and at 1 to 3 kb intervals in the 5' or 3' direction distal to sgRNA cut sites (e.g. a 5'-1 kb amplicon is located 1 kb in the 5' direction of the sgRNA cut sites).

#### **Supplementary Figure 4 – Quantification of repeat elements associated with larger deletions**

A) Annotated repetitive elements (green boxes with black outlines) were mapped alongside LDs using the UCSC genome browser RepeatMasker. LDs were defined as having neither end (grey bars), one end (orange bars), or two ends (red bars), intersecting within 100 bp of annotated repeat elements. A secondary deletion that was upstream from the original cut site and removed one of the S-R PCR primer binding sites in a clone targeted at Site 2 was contained within a simple tandem repeat (red bar marked with \*) B) Quantification of repeat intersections with 74 LDs and the same number of equally sized simulated deletions (\*\*\*\*,  $\chi^2$  test,  $p < 0.0001$ ).

#### **Supplementary Figure 5 – Previously published larger deletion alleles analysed for the presence of microhomologies**

A) Representative previously published (Adikusuma, 2018) LD alleles (green lines) identified at two selected sites targeted with 1xsgRNA (red bars) and Cas9 nuclease. B) Selected LD alleles previously published (Adikusuma, 2018) and the amount of microhomology that could be identified. Examples of LDs with microhomologies and corresponding reference sequences shown (mm9). Sequences outlined with blue boxes and highlighted in bold represent microhomologies. Red dashed vertical lines represent the exact breakpoint junctions in the repaired alleles. Total deletion size and microhomology amount are indicated. C) Frequency distribution of microhomology amount found in 69 previously published LDs (Wang 2013, Zhou 2014, Ma 2014, Parikh 2015, Zhang 2015, Mianne 2017, Adikusuma 2018) that were analysed for the presence of microhomology, the same number of simulated deletions across the genome with the same average length as LDs (Simulated), and the expected probability of finding homology at two sites for a  $k$ -mer of a given length (Chance) (\*,  $\chi^2$  test,  $p < 0.0001$ ). D) Quantification of the amount of microhomology identified at 69 previously published LD alleles and simulated deletions (\*\*\*\*, Mann-Whitney test,  $p < 0.0001$ ). All previously published LD alleles and microhomologies identified are available in Supplementary Table 5.

#### **Supplementary Figure 6 – Shorter Cas9 deletion distribution determined by deep sequencing to calculate background GC base pair content**

A) Histogram plots showing the number of deletion end points that were mapped along the entire sequenced region after targeting Sites 7 and 9 with one sgRNA each. The distribution of deletion ends approximates a normal distribution (smooth blue line) centred on the expected cut site (dashed red line). B) 93.5-94.5% of total deletion end points are contained within the amplicon region around the mean  $\pm 2$  standard deviations ( $\mu \pm 2\sigma$ ) of deletion ends. The GC base pair content over this region was taken as the expected GC base pair content of microhomologies found if there was no GC bias.

#### **Supplementary Figure 7 – Selected LD alleles that contained insertions and less microhomology**

A) LD alleles with short insertions at Sites 1, 9 and 15. Inserted sequences are highlighted with a purple box and microhomologies are highlighted in bold and with a blue box. B) Microhomology quantification at all LDs with and without short insertions (\*, Mann Whitney test,  $p < 0.0001$ ).

### **Supplementary Figure 8 – Distribution of microhomology sequences is dependent on microhomology length and deletion size**

A) Scatter plot showing deletion size vs microhomology size at all LDs and all SDs at Sites 7 and 9. Linear regression was done using the given formula and shown on the plot with 95% confidence intervals.  $R^2$  and p values are indicated above the plot with Pearson correlation r and p values. B) Scatter plot of alternative microhomology count vs microhomology size at all LDs and all SDs at Sites 7 and 9 with microhomology. Linear regression was done using the given formula and shown on the plot with 95% confidence intervals.  $R^2$  and p values are indicated above the plot with Pearson correlation r and p values. C) Scatter plot of alternative microhomology count vs deletion size at all LDs and all SDs at Sites 7 and 9 with microhomology. The red line ( $y=x/4$ ) indicates the chance of finding one nucleotide in a stretch of DNA with evenly distributed nucleotides of length x. Linear regression was done using the given formula and is shown on the plot with 95% confidence intervals.  $R^2$  and p values are indicated above the plot with Pearson correlation r and p values. D) Multiple linear regression was done using the given formula with adjusted  $R^2$  with p values, and residuals with p values indicated. The higher  $R^2$  values in (D) compared with (B and C) indicates that alternative microhomology count is dependent on the combination of both deletion size and microhomology size.

### **Supplementary Figure 9 – Multiple linear regression model of the distribution of Cas9-induced larger deletion sizes**

A) Histogram of residuals for the model (where residual = observed value - predicted value). B) Normal Q-Q plot for the model to check that residuals are normally distributed (which is an assumption of the linear regression model). C) Summary of multiple linear regression using the given formula with adjusted  $R^2$ , p values, and residuals with p values indicated.

### **Supplementary Table 1 – single guide RNAs used in the study**

### **Supplementary Table 2 – Primers used in the study**

### **Supplementary Table 3 - Summary of gene editing experiments in mouse zygotes in vivo**

### **Supplementary Table 4 - Summary of deletions analysed per site**

### **Supplementary Table 5 - Mapped deletion breakpoint sequences**

# Supplementary Figure 1

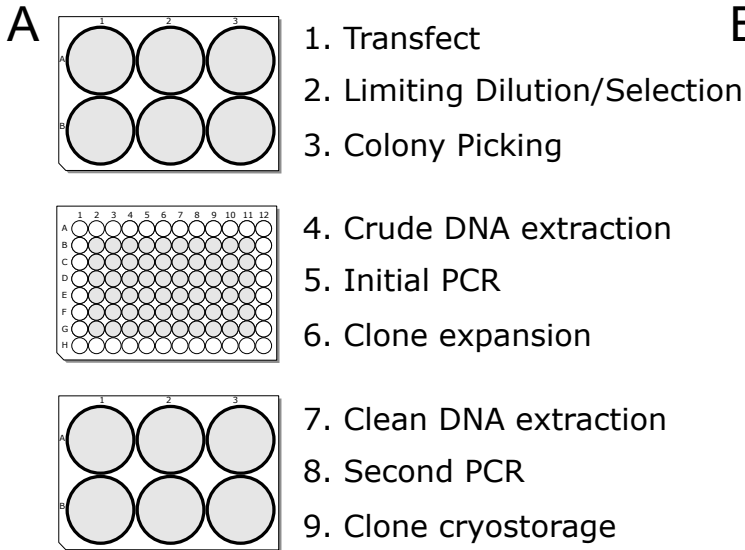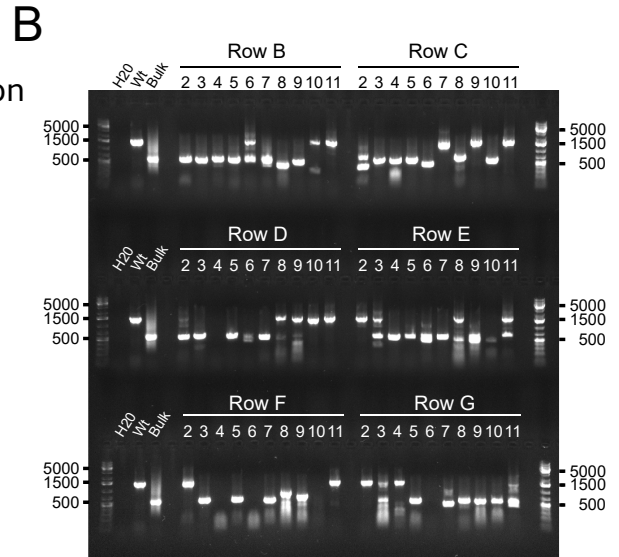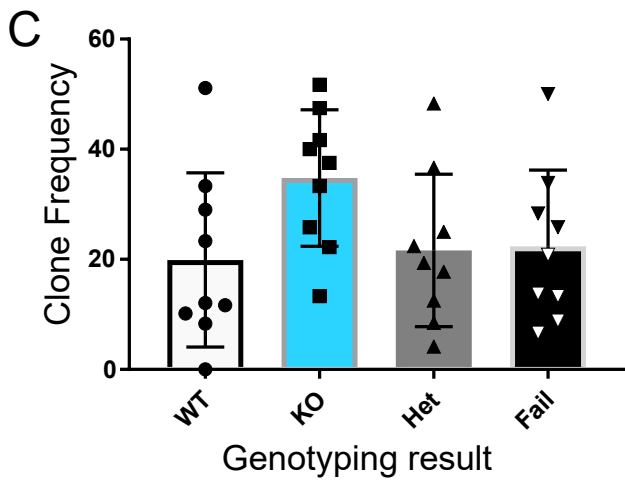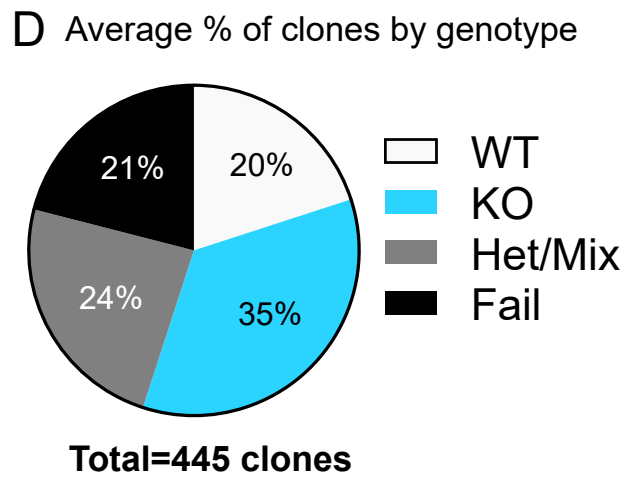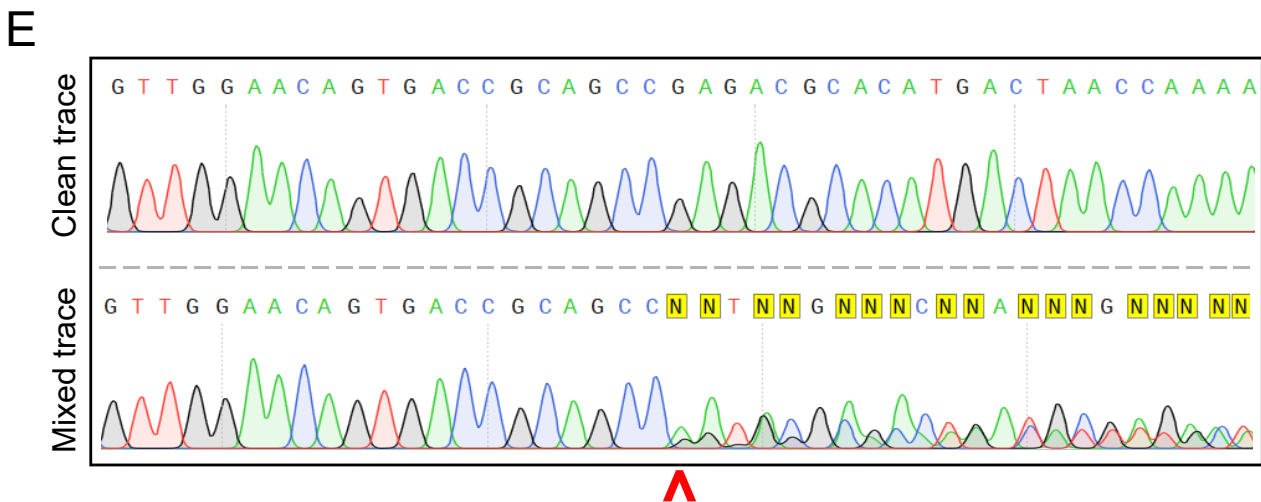

# Supplementary Figure 2

A

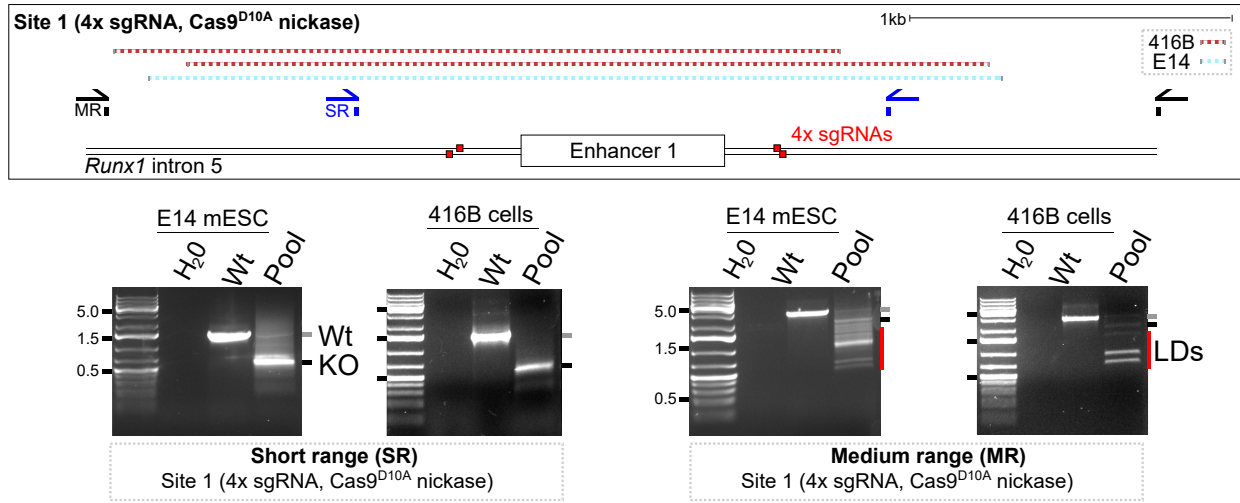

B

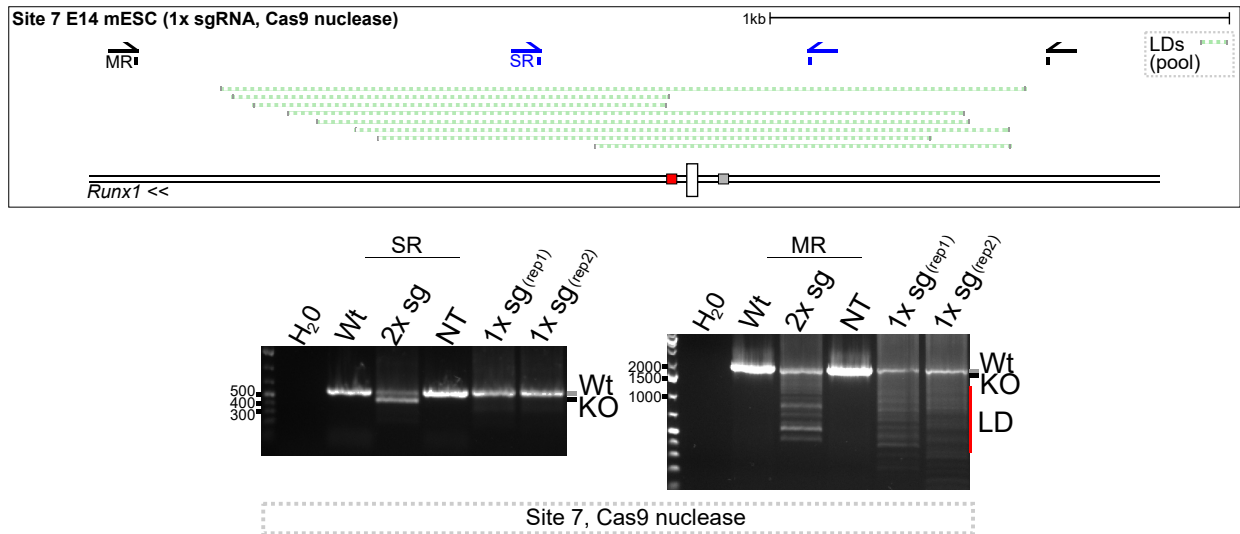

# Supplementary Figure 3

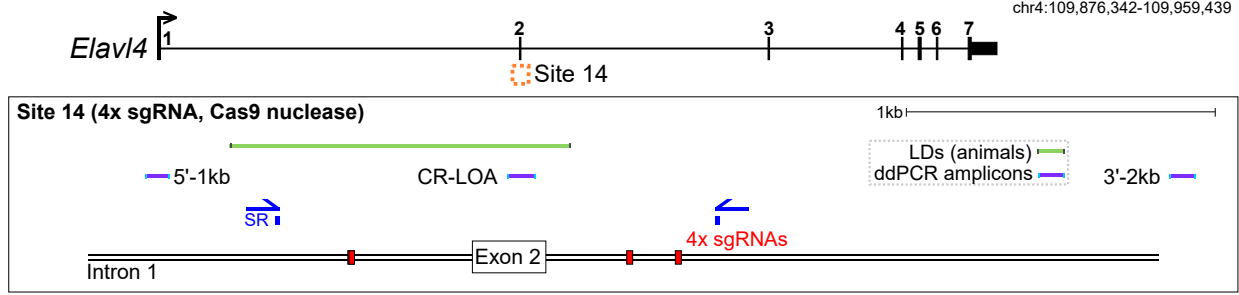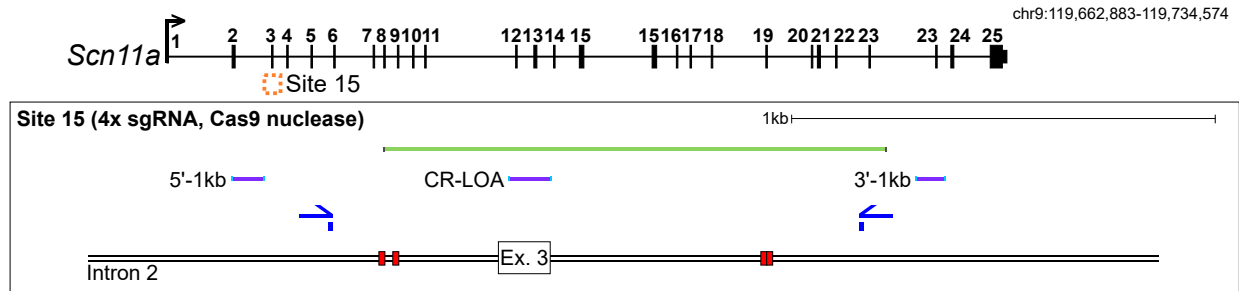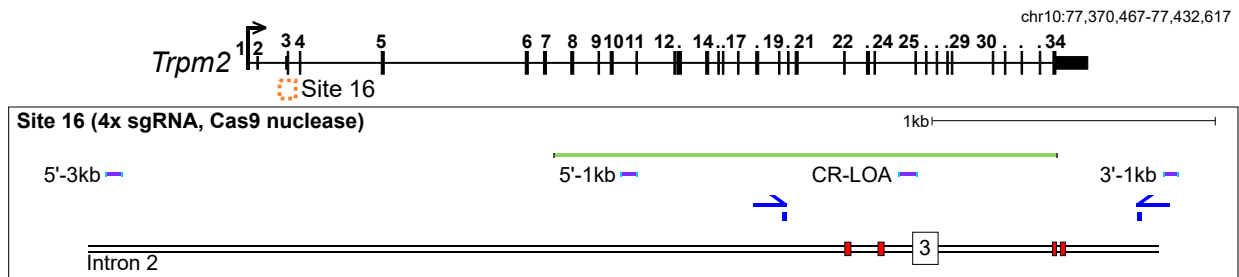

A

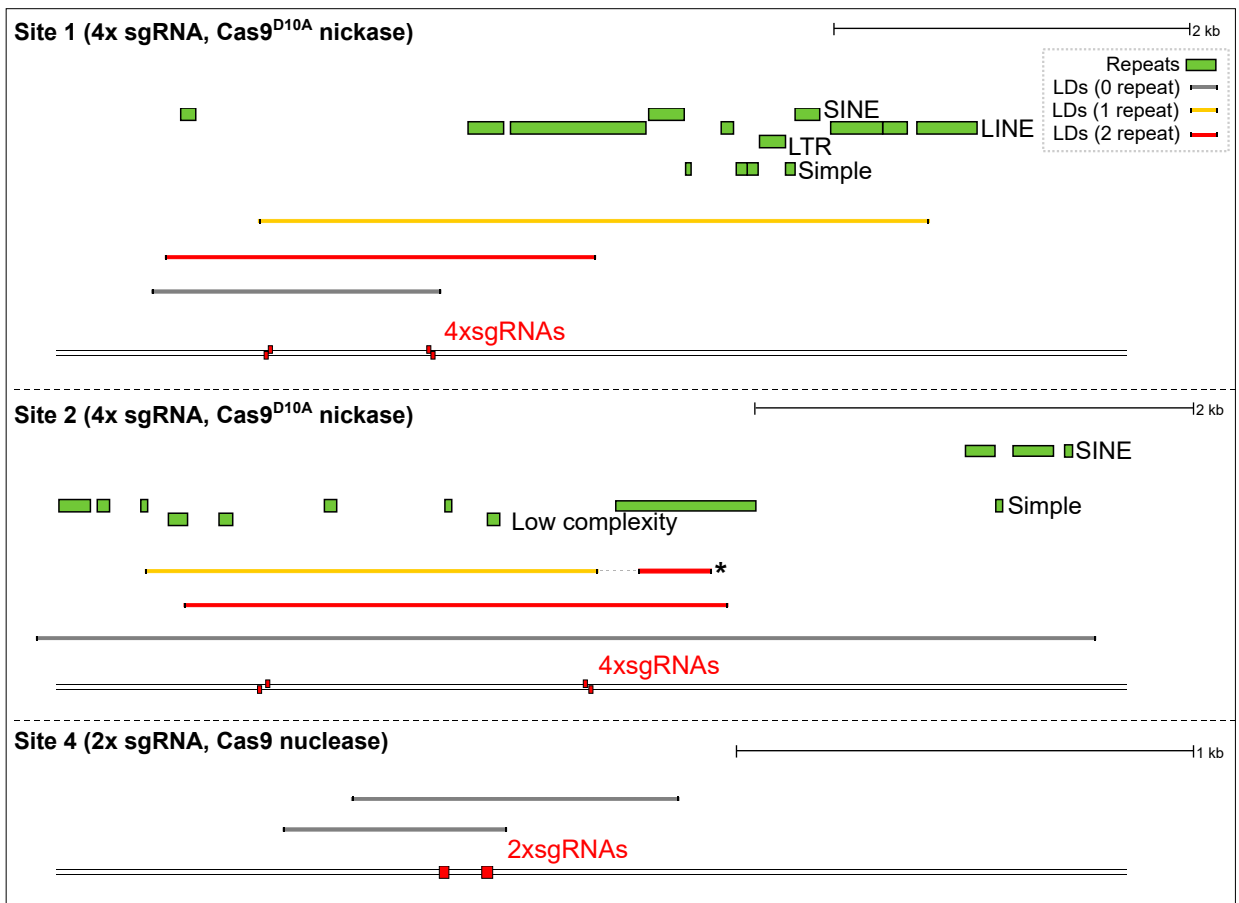

B

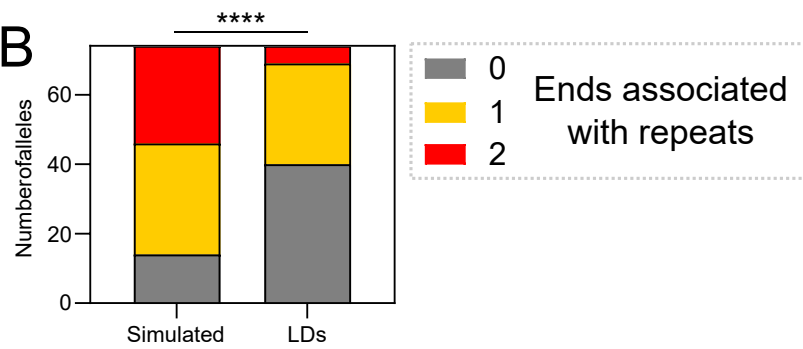

# Supplementary Figure 5

A

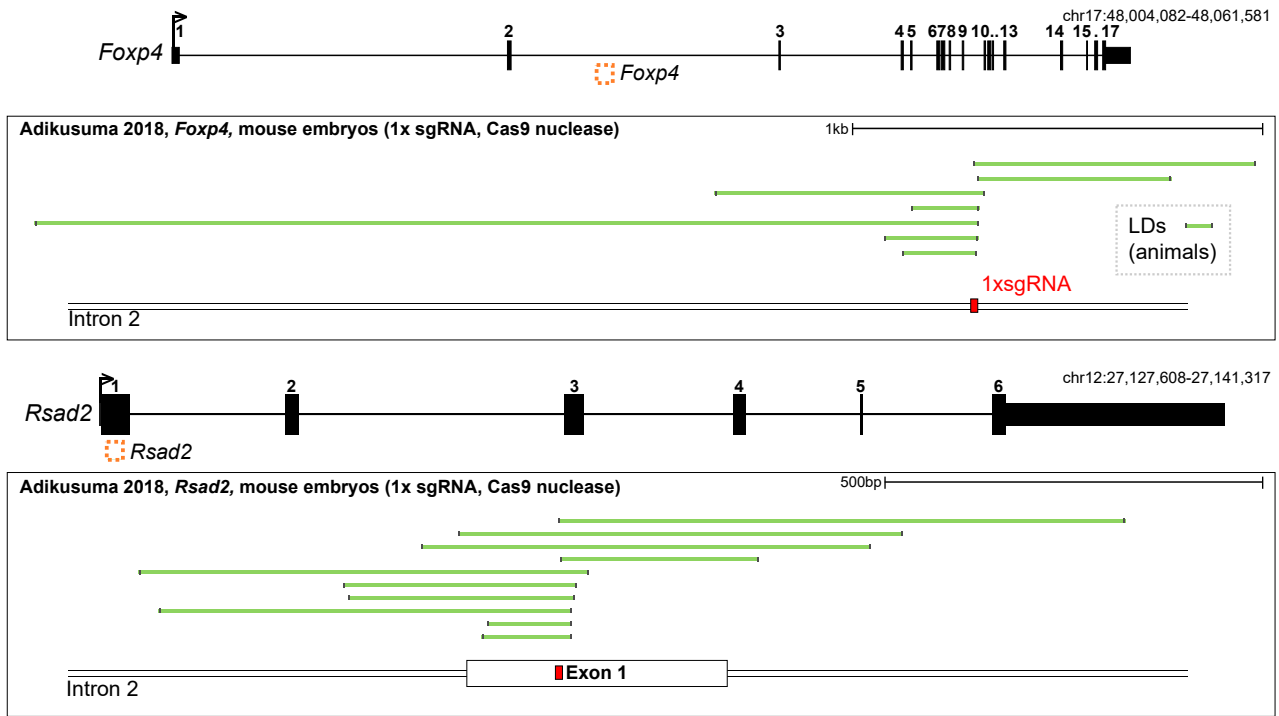

B

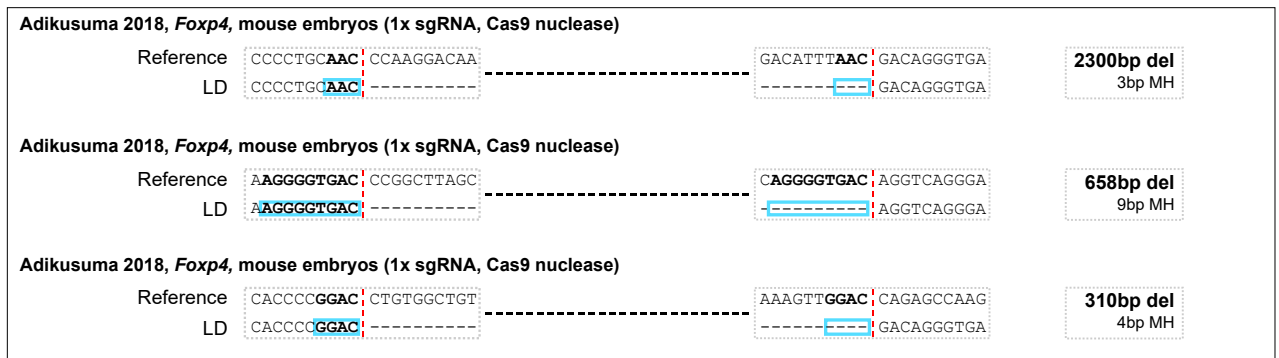

C

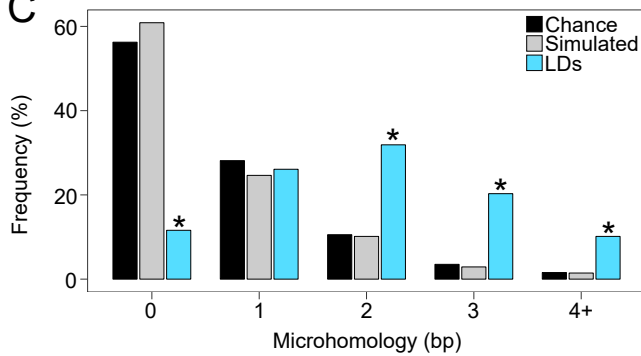

D

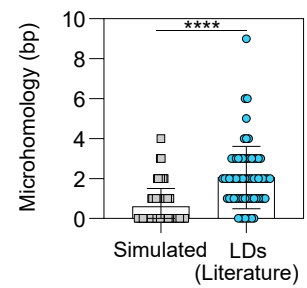



## Supplementary Figure 6

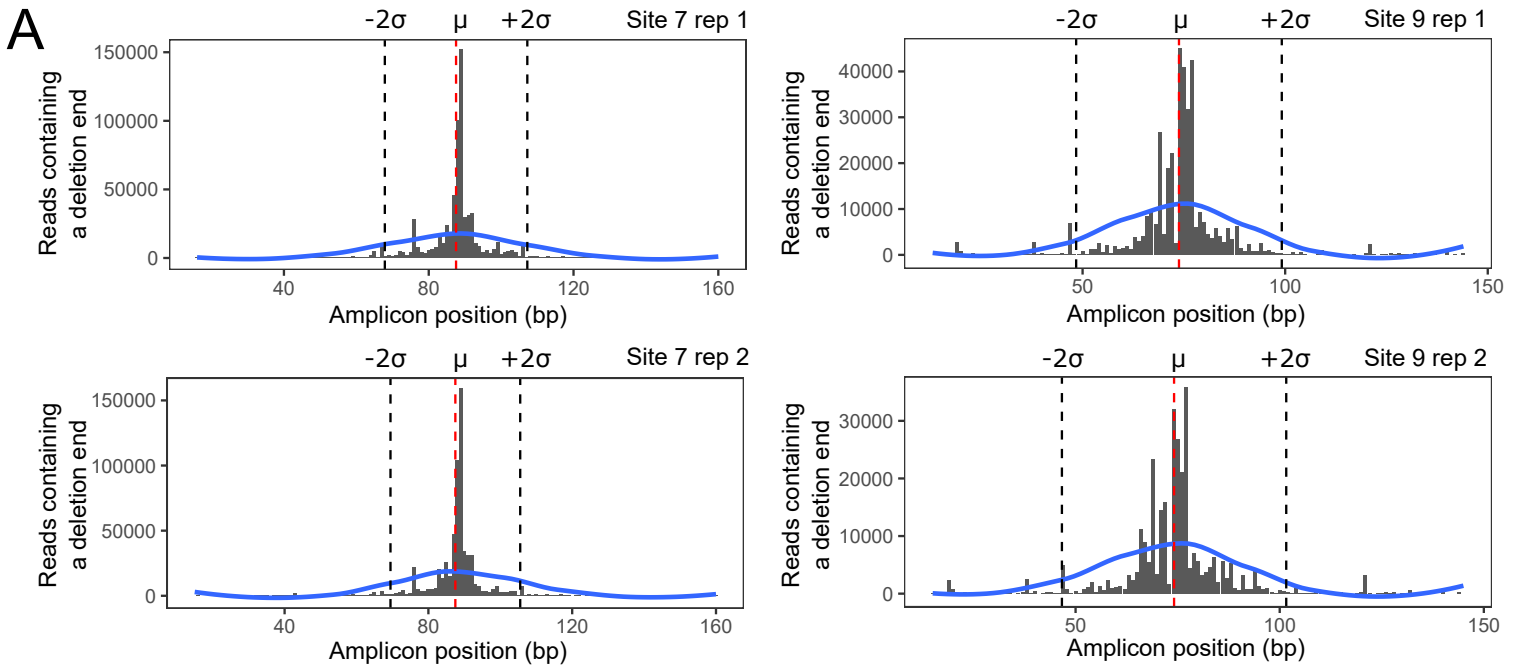

**B**

| Sample       | Mean ( $\mu$ ) | S.d. ( $\sigma$ ) | % of Reads ( $\mu \pm 2\sigma$ ) | GC% ( $\mu \pm 2\sigma$ ) |
|--------------|----------------|-------------------|----------------------------------|---------------------------|
| Site 7 rep 1 | 87.5           | 9.0               | 94.2                             | 43.2                      |
| Site 7 rep 2 | 87.6           | 9.8               | 94.3                             | 46.3                      |
| Site 9 rep 1 | 73.8           | 12.7              | 93.5                             | 48.1                      |
| Site 9 rep 2 | 74.1           | 13.7              | 94.5                             | 48.2                      |

# Supplementary Figure 7

**A**

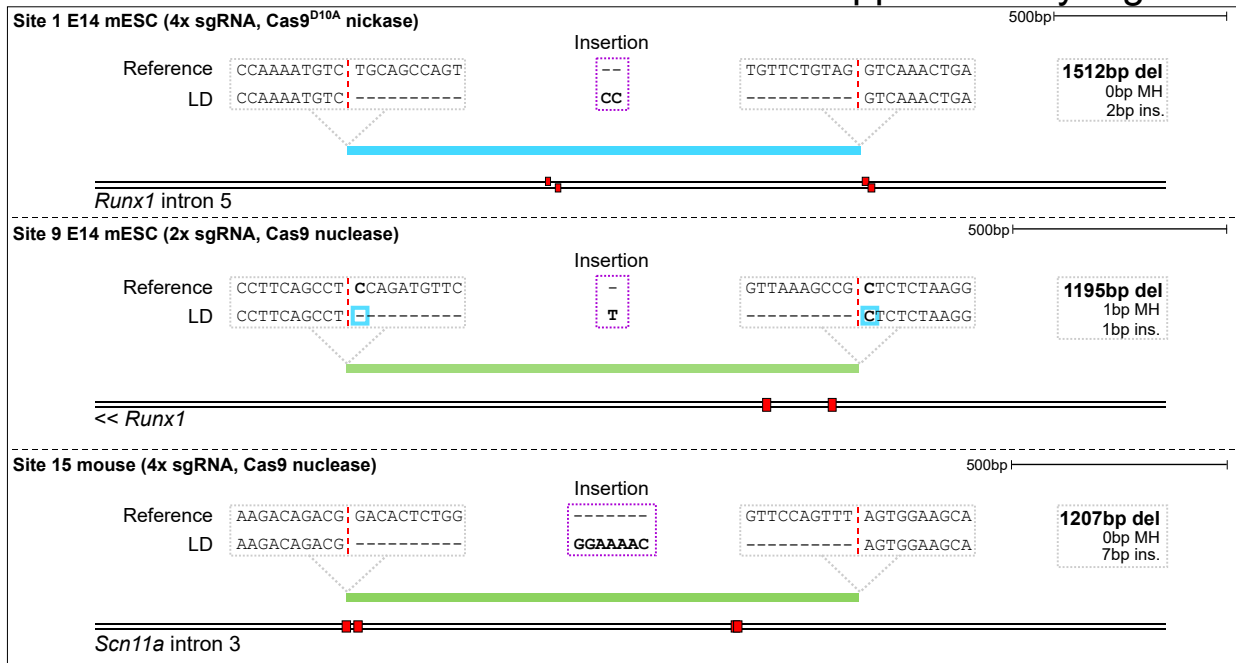

**B**

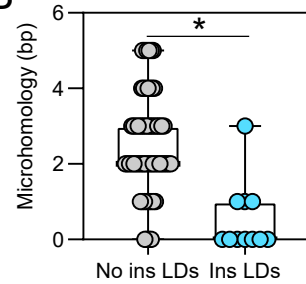

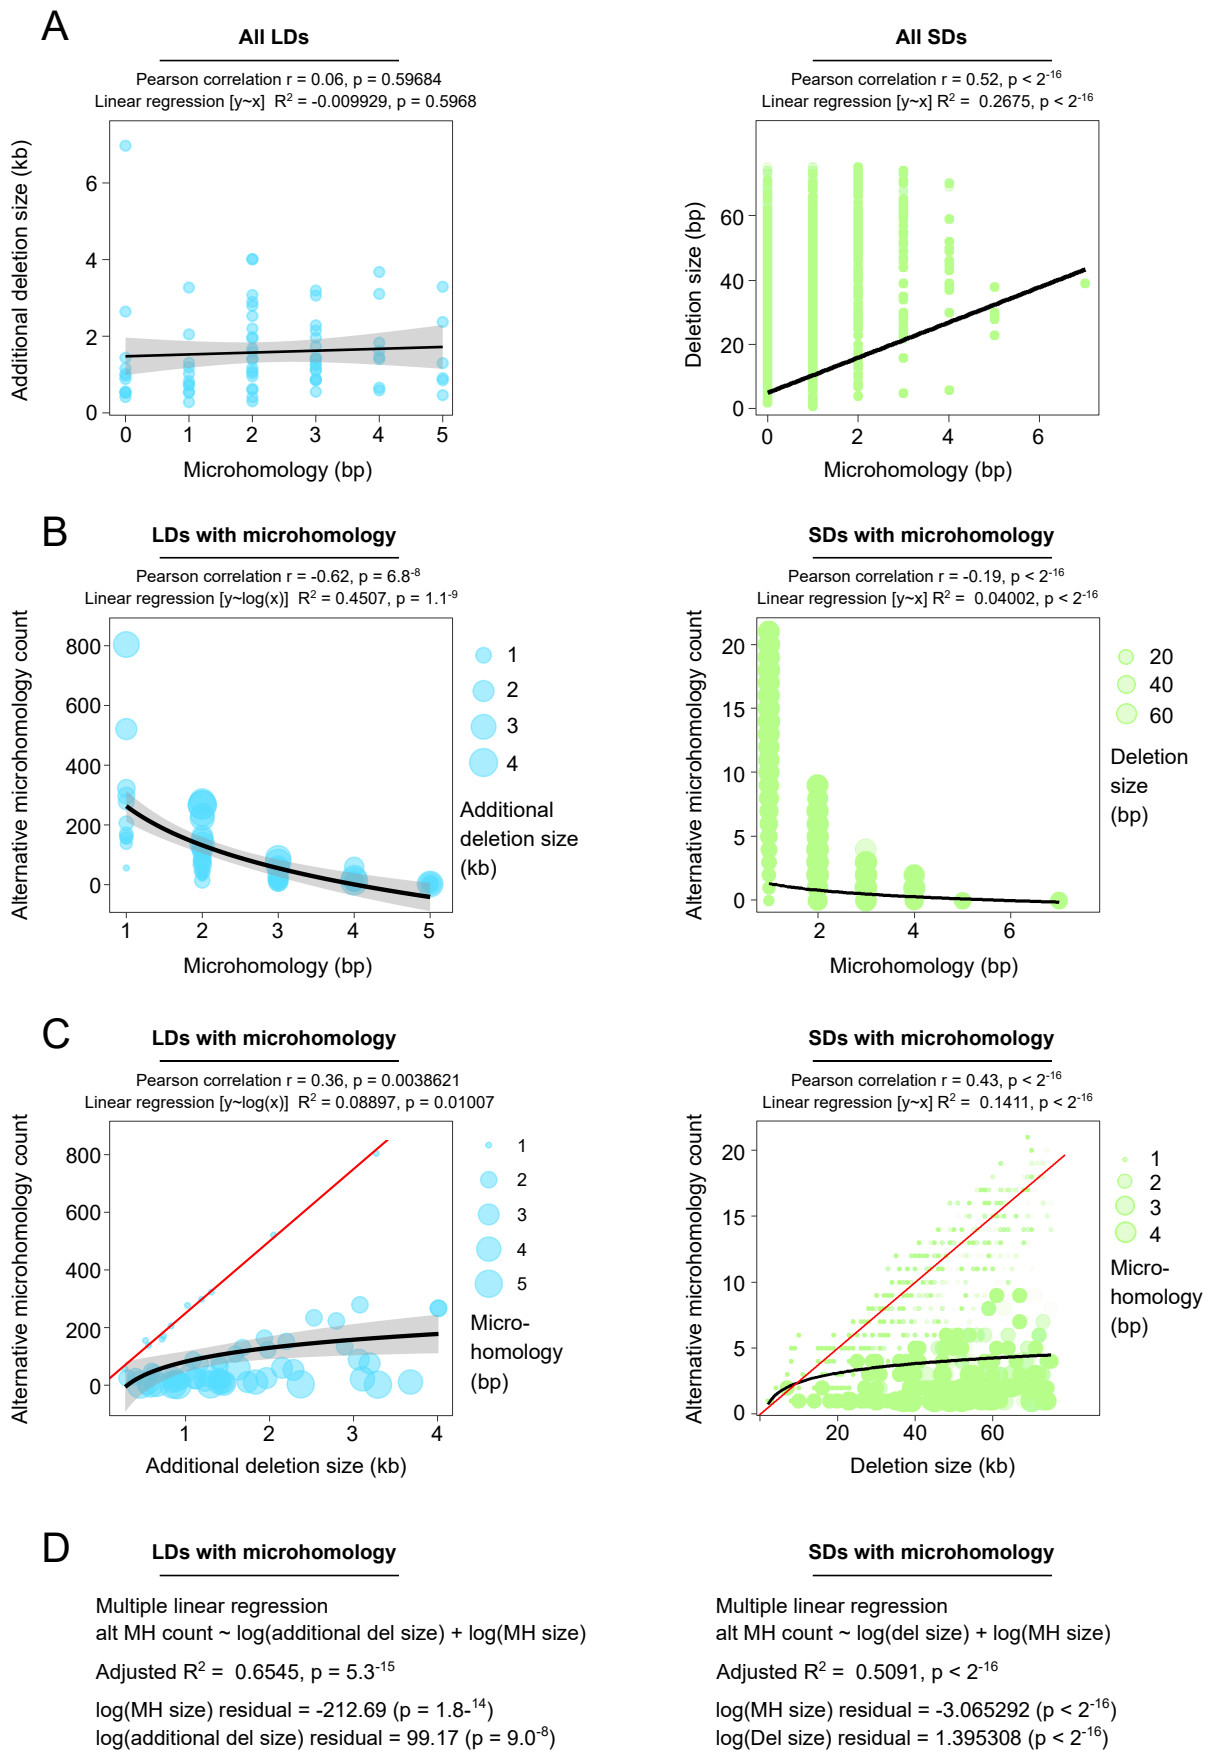

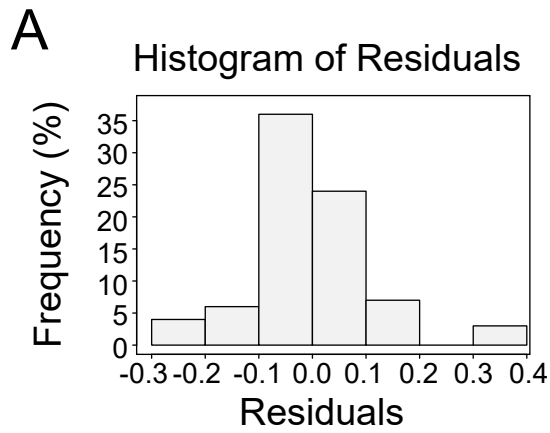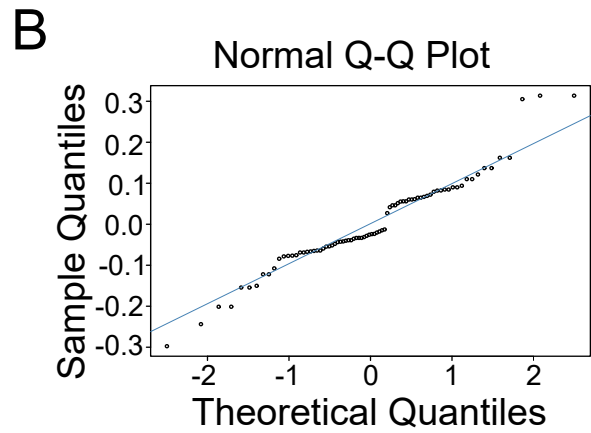

**C** Multiple linear regression summary

Call:  
lm(formula = deletionFrequency ~ log(proximity) + cutEfficiency, data = All)

Residuals:  

| Min      | 1Q       | Median   | 3Q      | Max     |
|----------|----------|----------|---------|---------|
| -0.21981 | -0.06501 | -0.02923 | 0.06411 | 0.30111 |

Coefficients:  

|                | Estimate  | Std. Error | t value | Pr(> t )     |
|----------------|-----------|------------|---------|--------------|
| (Intercept)    | 0.624518  | 0.070606   | 8.845   | 1.57e-12 *** |
| log(proximity) | -0.103572 | 0.005979   | -17.323 | < 2e-16 ***  |
| cutEfficiency  | 0.250865  | 0.083411   | 3.008   | 0.00382 **   |

---  
 Signif. codes: 0 '\*\*\*' 0.001 '\*\*' 0.01 '\*' 0.05 '.' 0.1 ' ' 1

Residual standard error: 0.1067 on 61 degrees of freedom  
 Multiple R-squared: 0.833, Adjusted R-squared: 0.8275  
 F-statistic: 152.1 on 2 and 61 DF, p-value: < 2.2e-16

Supplementary Table 1 – single guide RNAs used in the study

| sgRNA Name        | Sequence 5' to 3'              |
|-------------------|--------------------------------|
| Site1_sgRNA1      | TTGGTTAGTCATGTGCGTCT           |
| Site1_sgRNA2      | CCAAAATGTCTGCAGCCAGT           |
| Site1_sgRNA3      | GCCTAGTTCACCTTGAGCCTT          |
| Site1_sgRNA4      | CGCGTGTCCCTTTCCTTGGAC          |
| Site2_sgRNA1      | CCCTTGAATGGGATTCATGC           |
| Site2_sgRNA2      | AGAGAGTCCTGATCTAAATG           |
| Site2_sgRNA3      | GTACTTTTCAGAGAGCAAGT           |
| Site2_sgRNA4      | AATTATAGTACGTGTCTGTC           |
| Site3_sgRNA1      | AGACCAACCAGTCCTAAGAT           |
| Site3_sgRNA2      | ACCAGAGGATCAGCACTTGG           |
| Site3_sgRNA3      | GTTGCTCAGTGGCCCCTTCT           |
| Site3_sgRNA4      | GGCATCCCCTTTATCGCCGA           |
| Site4_sgRNA1      | GACTGATCCTCGCGCCGTCG           |
| Site4_sgRNA2      | AGCCCCGACATGACCGTGAA           |
| Site5_sgRNA1      | GGGTCTCCATAGGGCAAGGC           |
| Site5_sgRNA2      | GAGTCCTGTGATGATAGTCA           |
| Site6_sgRNA1      | ACAGCCGATTTTGTAGGCAA           |
| Site6_sgRNA2      | ACTTCAGATCAGCTTACCTT           |
| Site7_sgRNA1      | GTCCAAC T GAAAACGCCCTT         |
| Site7_sgRNA2      | CTCTGTGACTAGGTCTCTGA           |
| Site8_sgRNA1      | CACACCGCCCCCACTTCTT            |
| Site8_sgRNA2      | TACAGACCACCAGGAAAAGTC          |
| Site9_sgRNA1_D10A | GGTATGTAAAGCAAGGGACT           |
| Site9_sgRNA2_D10A | ACTCCCTAGTAGCTAGCCGT           |
| Site9_sgRNA3_D10A | GCCCACGTGTGAATATTTTA           |
| Site9_sgRNA4_D10A | TGCATATTCCTGGAAGATAG           |
| Site9_sgRNA1_Cas9 | GAAATATTCACACGTGGGCA           |
| Site9_sgRNA2_Cas9 | GTACCAACGGCTAGCTACTA           |
| Site10_sgRNA1     | TGATTTTCTCCACCCCTATC           |
| Site10_sgRNA2     | TCATCTTGGTGAGCTTGCAG           |
| Site10_sgRNA3     | ACCTGCGAAGGACCCTAAAT           |
| Site10_sgRNA4     | GGAGGGCAAGAGACCTGCGA           |
| Site11_sgRNA1     | AATGCGATGCTAGCCGTGGA           |
| Site11_sgRNA2     | ACGGCTAGCATCGCATT TAA          |
| Site11_sgRNA3     | CCCCTCCGTGCTCTGCGGAC           |
| Site11_sgRNA4     | GCCTGTCCGCAGAGCACGGA           |
| Site12_sgRNA1     | GCCTGCTAGCCCCCACC GCA          |
| Site12_sgRNA2     | GCCTTGCGGTGGGGGCTAGC           |
| Site12_sgRNA3     | TGATCCGGGAACATAAACGT           |
| Site12_sgRNA4     | CCGGAAGTAAAAGGGCTAGA           |
| Site13_sgRNA1     | CAAATAAGAGTGAGCACTAC           |
| Site13_sgRNA2     | GAGTGAGCACTACAGGTATG           |
| Site13_sgRNA3     | TAAC TTTGAGAGCGGAAACA          |
| Site13_sgRNA4     | TTCAGAATTGGCAGTAATCA           |
| Site14_sgRNA1     | TTATGAGATAGTTAATAAAC           |
| Site14_sgRNA2     | AGTGATTGTGTAATGAAAAC           |
| Site14_sgRNA3     | GTGCCTGGTTTTATGGGCAC           |
| Site14_sgRNA4     | ACTCCTGTGCCCATAAAACC           |
| Site15_sgRNA1     | CAGCCCCTGTAGTCGTTTGA           |
| Site15_sgRNA2     | CTAACCTTCAAACGACTACA           |
| Site15_sgRNA3     | CCCAACCAGTTCAGTTTAG            |
| Site15_sgRNA4     | ACACGGGGCTTCAAGATGCT           |
| Site16_sgRNA1     | GACAAGAAATTC C C C C A C C C G |
| Site16_sgRNA2     | CATTCTCAGTGGCTATCTTC           |
| Site16_sgRNA3     | GAGCACCCGGTGTCCATGCC           |
| Site16_sgRNA4     | CTTAGGCTGACCTATCTGCA           |

Supplementary Table 2 – Primers used in the study

| Primer Name          | Sequence 5' to 3'          |
|----------------------|----------------------------|
| Site1_SR_FW          | GGGTTAGGAGTGTCCCTGATGT     |
| Site1_SR_RV          | GAGGCAGCTTTGGAAGGGAAT      |
| Site1_MR_FW          | AGGTTGTCAGAACAAGCTACA      |
| Site1_MR_RV          | AGGGAGGAGTAAGGACGAATA      |
| Site1_LR_FW          | CTGGAATTTTCGTGACACAGAG     |
| Site1_LR_RV          | CCCAAGCTCCCAAATAAAC        |
| Site1_5'3kb_F        | ACGCACGAGGAGAAGAACATG      |
| Site1_5'3kb_probe    | CAGACACTGACTGGATCTCTCTTGCA |
| Site1_5'3kb_R        | TCCACACTCTCAACTCACAGAAG    |
| Site1_5'1kb_UPL52_F  | TGACAGTGAATTTCTCCTCACC     |
| Site1_5'1kb_UPL52_R  | TCCAGCCTCATATTCGTCT        |
| Site1_5'500bp_F      | CCACTCTGTCTGGAGGAGAGA      |
| Site1_5'500bp_probe  | TGCCAACGGAGAATGAGAGGTGTTA  |
| Site1_5'500bp_R      | TGCAAGGGTTCAGGGATAAGTC     |
| Site1_5'CR-LOA_F     | GGATGCCTCCCTTCAAAGTAAC     |
| Site1_5'CR-LOA_probe | CGTTGGAACAGTGACCGCAGCC     |
| Site1_5'CR-LOA_R     | GCCAAGCATTGTCTCCCA         |
| Site1_CR-LOA_F       | GCCACCACTTTCCTACACAA       |
| Site1_CR-LOA_probe   | ATCCTGGGTCTTTCTTACAAGGGTC  |
| Site1_CR-LOA_R       | GGAGGCTTGCACCTTCTCAT       |
| Site1_3'CR-LOA_F     | CCACCAAAGGCTCAAGTGAAC      |
| Site1_3'CR-LOA_probe | TAGGCTGATGTCCCCGCGTGT      |
| Site1_3'CR-LOA_R     | CCCTCCCTGTCCAAGGAAA        |
| Site1_3'500bp_F      | CTGTGGCCTCAAGTGTAGTC       |
| Site1_3'500bp_probe  | TGCCTTAGCGAGTGATCTGTGTGC   |
| Site1_3'500bp_R      | GGCCGCTCCTTTCTTCTGA        |
| Site1_3'1kb_UPL16_F  | CCTGTTGCACCTGGTTCTTAG      |
| Site1_3'1kb_UPL16_R  | TGAAGTCACATAAAATGTTTCATTCC |
| Site1_3'3kb_F        | GCAGGCCACTCTGGTATGAA       |
| Site1_3'3kb_probe    | TGGCAGCGTCATGGTGGACTCT     |
| Site1_3'3kb_R        | GGAGACAGTACAAAGCACCATGAC   |
| Site2_SR_FW          | CCTCAGAGGCCAGAAGTACCTAAT   |
| Site2_SR_RV          | TTGGTGGTCTTTTCCCCGTG       |
| Site2_MR_FW          | TGCTCAGCAGAATTGAGGTC       |
| Site2_MR_RV          | CTGCACAGCTCGGAGTATTT       |
| Site2_LR_FW          | GCAGAATCTTCGGAGCTATTC      |
| Site2_LR_RV          | GTAAGCTGAGCAGTGGTATTT      |
| Site3_SR_FW          | TTCTCCCATACCTCTCTGATATTG   |
| Site3_SR_RV          | GAGATGCTGGAGTTCCTGAGATA    |
| Site3_MR_FW          | GCTGCTCTCAACACAGTACAA      |
| Site3_MR_RV          | AGATCATTTGATGAAAGGCCTCA    |
| Site3_LR_FW          | GAGCATCCCTCAGAAGAGAA       |
| Site3_LR_RV          | CAGTGTGGTCAAGCTGATATG      |
| Site4_SR_FW          | CCCGCTACTGTCCACATATT       |
| Site4_SR_RV          | AGAGGCTTTGAGAAGAGATGAG     |
| Site4_MR_FW          | GAAGTGGCACCGAGTCATTTA      |
| Site4_MR_RV          | CCTGATCGAGCTTCGAACTAAC     |
| Site4_LR_FW          | TAATCTCGTGGTCTCAGAGT       |

|                       |                                |
|-----------------------|--------------------------------|
| Site4_LR_RV           | CAGCAGGATGGGAATCTAAC           |
| Site5_SR_FW           | ACTTAAGTGTCCACTCCGATTA         |
| Site5_SR_RV           | GGGATTAAGCACTTCTTTAGGC         |
| Site5_MR_FW           | CCACCTATTGACCTCTTCGTTCC        |
| Site5_MR_RV           | TGCTACTGACTAATTTGAGGGTATT      |
| Site5_LR_FW           | TAGTTGGAAGGCTGGGATAG           |
| Site5_LR_RV           | AAGCTGGCAAGTAATGGAAT           |
| Site6_SR_FW           | TCCTTTTCGTCCTCTGATGTA          |
| Site6_SR_RV           | CACCTGAGAGAACACAATACC          |
| Site6_MR_FW           | TCCATTGTCCACTGCTTTAC           |
| Site6_MR_RV           | GTATACAATTCTGCCCTAGCC          |
| Site7_SR_FW           | GTGGTCACTAGCTGTCTTCC           |
| Site7_SR_RV           | GAAGTTGTGTAATGGCCACAG          |
| Site7_MR_FW           | GTATGCAGTTAGCCACAGAG           |
| Site7_MR_RV           | GCGGTGTGAATGATATCCAA           |
| Site7_NGS_FW          | ACACTCTTTCCCTACACGACGCTCTTCC   |
|                       | GATCTAGCACTGAAATCTGGTGCAT      |
| Site7_NGS_RV          | GACTGGAGTTCAGACGTGTGCTCTTCC    |
|                       | GATCTCTTGCCCTCAGAGACCTAGT      |
| Site8_SR_FW           | CCTTGTCAACAGCTCACTTT           |
| Site8_SR_RV           | CCTGCTCTAGCTTTGTTCTG           |
| Site8_MR_FW           | GCATATTTCCCTCTCAGAGTC          |
| Site8_MR_RV           | GAAATGGATAGGAGCAGGAAG          |
| Site9_SR_FW           | CTCCGTAGCCTCTCCTAATGAT         |
| Site9_SR_RV           | CTACACAGGAGTCTCTGAATCCAT       |
| Site9_MR_FW           | TGCTGTAGCAAGCTTAGGGTGT         |
| Site9_MR_RV           | GCGAAAAGACTGCCTCAAGTTC         |
| Site9_NGS_FW          | ACACTCTTTCCCTACACGACGCTCTTCC   |
|                       | GATCTGAGGCAGAGATGACACTGAA      |
| Site9_NGS_RV          | GACTGGAGTTCAGACGTGTGCTCTTCC    |
|                       | GATCTGCAATGAGCTTCTGGTTGAC      |
| Site9_5'3kb_F         | AGCACACAACAGTCCTCTCA           |
| Site9_5'3kb_Probe     | CGAAAGCTCTTCCTGTCATTGTCTTTATGA |
| Site9_5'3kb_R         | CCACTACAAGCATGGGACAG           |
| Site9_5'1kb_UPL52_F   | CCTAGGCGGCTAACCTCAC            |
| Site9_5'1kb_UPL52_R   | GAGAAGGGTAGGCAATGGTG           |
| Site9_5'500bp_UPL63_F | GACCTCATGACCAATACCATGA         |
| Site9_5'500bp_UPL63_R | GTTCTGAGGGTCTTGGAGGA           |
| Site9_5'CR-LOA_F      | GCCGTTGGTAATAGTTGGATCATTC      |
| Site9_5'CR-LOA_Probe  | TCACTATTGTGAGAGCTCCCGCTG       |
| Site9_5'CR-LOA_R      | CGCACTGTGAGGGAAACAAC           |
| Site9_CR-LOA_F        | AGTGCGGAGGGCAGATTAAGG          |
| Site9_CR-LOA_Probe    | CGGCGACATCGCTGTGTTTGCAT        |
| Site9_CR-LOA_R        | AGGGTGGATGCCAGCAGATG           |
| Site9_3'CR-LOA_F      | TGCAGCCTGTGATGAGGTTAG          |
| Site9_3'CR-LOA_Probe  | AGCCCCTGCCACGTGTGAATAT         |
| Site9_3'CR-LOA_R      | CTGAAGGTGTCACCCCTATCTTC        |
| Site9_3'500bp_UPL16_F | GCTCATGACCTTTAACTTCCTACAC      |
| Site9_3'500bp_UPL16_R | TTTCTGAAAAGGGTAACATAAGTGAGT    |
| Site9_3'1kb_UPL38_F   | CGGGCTGAGCTTATAAATCG           |

|                       |                             |
|-----------------------|-----------------------------|
| Site9_3'1kb_UPL38_R   | CCTGGTGGATCTGACAGACA        |
| Site9_3'3kb_UPL34_F   | TGCATAGATGCGATGTTGTTT       |
| Site9_3'3kb_UPL34_R   | CCACCGTGGAGGAAGTTACA        |
| Site10_SR_FW          | TTCTGATGAGTGTTGGCGGA        |
| Site10_SR_RV          | CTAGGTAGAGTTCGCGGGAG        |
| Site10_MR_FW          | CAGGTCCAGAGCTGAGTCTTTC      |
| Site10_MR_RV          | CCCATATCAGAAGTGAGCCTCT      |
| Site10_5'3kb_UPL60_F  | CACACTTACGGCAACTTTATCCT     |
| Site10_5'3kb_UPL60_R  | TGGCTCCAAAACATGAAGC         |
| Site10_5'1kb_UPL88_F  | CAGGTCCAGAGCTGAGTCTTTC      |
| Site10_5'1kb_UPL88_R  | GTTGCTGGGTGAGTCAGGAG        |
| Site10_CR-LOA_UPL59_F | CAGAGGCAGGGGTAGGATTT        |
| Site10_CR-LOA_UPL59_R | GGTCCTTCGCAGGTCTCTT         |
| Site10_3'1kb_UPL81_F  | GCTGACCACGCCCACTAC          |
| Site10_3'1kb_UPL81_R  | CCGCTTCTTAGCCAGCAG          |
| Site10_3'3kb_UPL69_F  | GTTTCCACATCATCGTCCATT       |
| Site10_3'3kb_UPL69_R  | CTTCCTGCCCTGTTTGTGTT        |
| Site11_SR_FW          | CCGGAGAACATGTGTAGAAGTC      |
| Site11_SR_RV          | ATTAGGACATGCATATGAAAAGTGT   |
| Site11_MR_FW          | GCTAAATGGGATTAATGTTTAACGA   |
| Site11_MR_RV          | GGAAGTCTGTCATACAGATCTCAATTT |
| Site11_5'10kb_UPL21_F | TGGATGACTGCCCTCAAACCT       |
| Site11_5'10kb_UPL21_R | GGCATGATCAGATGGTGTGT        |
| Site11_5'6.5kb_UPL8_F | AGGCGGAGGACCACATTT          |
| Site11_5'6.5kb_UPL8_R | ACCCTTTCTCCAAAGGTCTGT       |
| Site11_5'5kb_UPL12_F  | GAGAAACAAATGGGATTACTTCAGA   |
| Site11_5'5kb_UPL12_R  | AGAGTCCAAGCAACCACAGG        |
| Site11_5'3kb_UPL13_F  | TCCTCACTTTGATCCTATTTGTCA    |
| Site11_5'3kb_UPL13_R  | CATGGGGAGGAAGTCAATGT        |
| Site11_5'1kb_UPL17_F  | CATGATGGCAGGGAAGTCA         |
| Site11_5'1kb_UPL17_R  | TGAACAAAGAATCGGTGCAG        |
| Site11_CR-LOA_UPL8_F  | GCCAACCATCACAAAGGTAAGT      |
| Site11_CR-LOA_UPL8_R  | CAGACCAGTGAAGACAGAATGTG     |
| Site11_3'1kb_UPL15_F  | TCCAAGAGGTGTAACTGTCTGAG     |
| Site11_3'1kb_UPL15_R  | GGACCCTTGGAGTAACTGTCA       |
| Site11_3'3kb_UPL11_F  | AAGGAGTGTGCTAATGGCATGT      |
| Site11_3'3kb_UPL11_R  | AAGACCTTCTAGGCCTTTGTGTT     |
| Site12_SR_FW          | ACAATGTCAACGGGGTCAGG        |
| Site12_SR_RV          | TGTTTCGACGTGCTCACCTTC       |
| Site12_MR_FW          | GAGAGGGCAGGAACTTTGC         |
| Site12_MR_RV          | GCAAGCAAGGTGCTAACAGA        |
| Site12_5'1kb_UPL84_F  | GAGAGGGCAGGAACTTTGC         |
| Site12_5'1kb_UPL84_R  | CAAATCTTGCCCAACAATAA        |
| Site12_CR-LOA_UPL7_F  | GGCAAGAAGTTGGCAAGG          |
| Site12_CR-LOA_UPL7_R  | CCACATGCAGAGTGGTAAGG        |
| Site12_3'1kb_UPL59_F  | TACCAGGCGGTAGGTGACTT        |
| Site12_3'1kb_UPL59_R  | GCGAAAACAACCCTCCAG          |
| Site12_3'3kb_UPL3_F   | ATCGGACTGTCTTGCTCTGG        |
| Site12_3'3kb_UPL3_R   | CTTTTCCCCTTGCAGCTATTT       |
| Site13_SR_FW          | CGGCGTTAGCTGGACTTCAA        |



|                       |                          |
|-----------------------|--------------------------|
| Site13_SR_RV          | TGGACGAGGCTTTAGATGTGG    |
| Site13_MR_FW          | CGACTCCACCCCATTTCTT      |
| Site13_MR_RV          | GCTGCACCTACATTGAGATCC    |
| Site13_5'3kb_UPL50_F  | AGGTTTCATTCCCTAGAGGCTTT  |
| Site13_5'3kb_UPL50_R  | AAGAACTAACAGCCCCAATCC    |
| Site13_5'1kb_UPL10_F  | CGACTCCACCCCATTTCTT      |
| Site13_5'1kb_UPL10_R  | CGACAGCCCCATACTGAGAC     |
| Site13_CR-LOA_UPL4_F  | CCCTGCAGGTTACTGGAGAA     |
| Site13_CR-LOA_UPL4_R  | AGTGTGCGTGGTCACTGG       |
| Site13_3'1kb_UPL24_F  | CTGGGGAGCAGCTCTTGT       |
| Site13_3'1kb_UPL24_R  | GCTGCACCTACATTGAGATCC    |
| Site13_3'3kb_UPL16_F  | CAGAAGGCGGGGTCATAGT      |
| Site13_3'3kb_UPL16_R  | AGACCCAACCTGATTCATGC     |
| Site14_SR_FW          | ATTAGATGACTTTGCATCTCCCCC |
| Site14_SR_RV          | TGTCATCCTACTTGGCCCTCT    |
| Site14_5'1kb_UPL38_F  | GCTGCATAATGAGAGCAGTGA    |
| Site14_5'1kb_UPL38_R  | TCGAGGCTGATGTGAGTGAC     |
| Site14_CR-LOA_UPL7_F  | CCGACATCCAATACAAGCAAT    |
| Site14_CR-LOA_UPL7_R  | GGTTTTGCTGTCATCTGTGG     |
| Site14_3'1kb_UPL26_F  | TGACTTGCTCATCCTATCTTGC   |
| Site14_3'1kb_UPL26_R  | GAGGCCCTGTAAAGTGGTG      |
| Site15_SR_FW          | ACACCTGGTGACCTTTTCCC     |
| Site15_SR_RV          | AGACTCAAATGCCTCTGGGC     |
| Site15_5'1kb_UPL3_F   | AGGAGGAAAGGCAAAGAGGA     |
| Site15_5'1kb_UPL3_R   | GCAAAGCCCAGATCATGC       |
| Site15_CR-LOA_UPL57_F | CACAGACATTCATGGTATTGAACA |
| Site15_CR-LOA_UPL57_R | CATGAAGCTTCTGATGGGATTA   |
| Site15_3'1kb_UPL21_F  | CCCCCAATGGTCTTTTTACTC    |
| Site15_3'1kb_UPL21_R  | GGGACTTTATGAGCCCAAGAC    |
| Site16_SR_FW          | AGGTGGTCCATTCATGCTGC     |
| Site16_SR_RV          | GTGAAGGGAGAAATGATCGCC    |
| Site16_5'3kb_UPL4_F   | TCGCCCCTTCTTTTCAGAC      |
| Site16_5'3kb_UPL4_R   | TGTATGCCTTTAGTCCCAGCA    |
| Site16_5'1kb_UPL10_F  | TGATGACATCTTTGATCCCAGT   |
| Site16_5'1kb_UPL10_R  | GCTGGCCTCGAACTCAGA       |
| Site16_CR-LOA_UPL21_F | ACTCTCGGACGCAGGGTAA      |
| Site16_CR-LOA_UPL21_R | GTTCCATCTCTCCTGGCTCA     |
| Site16_3'1kb_UPL15_F  | TCCGACGAAGCAATAGCAGc     |
| Site16_3'1kb_UPL15_R  | TCACTGCTGAAAGAGCACAGA    |

Supplementary Table 3 - Summary of gene editing experiments in mouse zygotes in vivo

| Gene     | MGI ID  | By PCR                  |                                | By ddPCR                |                                | No. of animals with a larger than expected deletion | No. of control littermate animals assessed | No. of animals with a larger than expected deletion |
|----------|---------|-------------------------|--------------------------------|-------------------------|--------------------------------|-----------------------------------------------------|--------------------------------------------|-----------------------------------------------------|
|          |         | No. of animals assessed | No. of animals with a deletion | No. of animals assessed | No. of animals with a deletion |                                                     |                                            |                                                     |
| Ajuba    | 1341886 | 21                      | 9                              | 11                      | 9                              | 0                                                   | 2                                          | 0                                                   |
| Ap3b2    | 1100869 | 12                      | 9                              | 10                      | 10                             | 1                                                   | 1                                          | 1                                                   |
| Arhgap42 | 1918794 | 11                      | 5                              | 7                       | 5                              | 0                                                   | 2                                          | 0                                                   |
| Cckbr    | 99479   | 16                      | 9                              | 11                      | 11                             | 2                                                   | 2                                          | 2                                                   |
| Col1a2   | 88468   | 21                      | 10                             | 13                      | 9                              | 0                                                   | 3                                          | 0                                                   |
| Fam19a2  | 2143691 | 13                      | 5                              | 8                       | 8                              | 3                                                   | 3                                          | 2                                                   |
| Gch1     | 95675   | 13                      | 9                              | 12                      | 10                             | 2                                                   | 3                                          | 2                                                   |
| Gls      | 95752   | 20                      | 1                              | 2                       | 1                              | 0                                                   | 1                                          | 0                                                   |
| Gria1    | 95808   | 7                       | 7                              | 7                       | 7                              | 0                                                   | 0                                          | 0                                                   |
| Hpca     | 1336200 | 19                      | 6                              | 8                       | 6                              | 0                                                   | 2                                          | 0                                                   |
| Itga11   | 2442114 | 11                      | 5                              | 9                       | 5                              | 0                                                   | 4                                          | 0                                                   |
| Itsn1    | 1338069 | 13                      | 2                              | 3                       | 2                              | 0                                                   | 1                                          | 0                                                   |
| Kcnma1   | 99923   | 18                      | 6                              | 8                       | 6                              | 0                                                   | 2                                          | 0                                                   |
| Limd1    | 1352502 | 6                       | 2                              | 4                       | 2                              | 0                                                   | 2                                          | 0                                                   |
| Nedd1    | 97293   | 20                      | 6                              | 8                       | 5                              | 0                                                   | 2                                          | 0                                                   |
| P3h2     | 2146663 | 12                      | 4                              | 8                       | 4                              | 0                                                   | 4                                          | 0                                                   |
| Pcdh8    | 1306800 | 10                      | 4                              | 10                      | 8                              | 4                                                   | 6                                          | 4                                                   |
| Pde2a    | 2446107 | 8                       | 4                              | 8                       | 4                              | 0                                                   | 4                                          | 0                                                   |
| Prkra    | 1344375 | 15                      | 6                              | 8                       | 6                              | 0                                                   | 2                                          | 0                                                   |
| Rgs2     | 1098271 | 6                       | 3                              | 6                       | 6                              | 0                                                   | 3                                          | 0                                                   |
| Rnf168   | 1917488 | 23                      | 10                             | 17                      | 10                             | 0                                                   | 7                                          | 0                                                   |
| Rsad2    | 1929628 | 7                       | 1                              | 3                       | 1                              | 0                                                   | 2                                          | 0                                                   |
| Sec31a   | 1916412 | 57                      | 5                              | 8                       | 5                              | 0                                                   | 3                                          | 0                                                   |
| Senp5    | 2443596 | 10                      | 4                              | 5                       | 5                              | 1                                                   | 1                                          | 1                                                   |
| Shisa9   | 1919805 | 6                       | 4                              | 6                       | 4                              | 0                                                   | 2                                          | 0                                                   |
| Slc17a7  | 1920211 | 8                       | 3                              | 8                       | 4                              | 1                                                   | 5                                          | 1                                                   |
| Slc9a7   | 2444530 | 4                       | 2                              | 4                       | 2                              | 0                                                   | 2                                          | 0                                                   |
| Tbx15    | 1277234 | 6                       | 2                              | 3                       | 2                              | 0                                                   | 1                                          | 0                                                   |
| Tfrc     | 98822   | 11                      | 9                              | 11                      | 9                              | 0                                                   | 2                                          | 0                                                   |
| Th       | 98735   | 26                      | 3                              | 4                       | 2                              | 0                                                   | 1                                          | 0                                                   |
| Tpo      | 98813   | 6                       | 3                              | 5                       | 2                              | 0                                                   | 2                                          | 0                                                   |
| Trpc1    | 109528  | 18                      | 5                              | 7                       | 5                              | 0                                                   | 2                                          | 0                                                   |
| Usp31    | 1923429 | 14                      | 4                              | 5                       | 3                              | 0                                                   | 1                                          | 0                                                   |

Supplementary Table 4 - Summary of all deletions analysed per site

| Site number   | Chromosome | Gene locus      | Description | Larger Deletions | Expected Deletions |
|---------------|------------|-----------------|-------------|------------------|--------------------|
| 1             | 16         | <i>Runx1</i>    | Non-coding  | 12               | 5                  |
| 2             | 16         | <i>Runx1</i>    | Non-coding  | 4                | 5                  |
| 3             | 16         | <i>Runx1</i>    | Non-coding  | 3                | 5                  |
| 4             | 16         | <i>Runx1</i>    | Non-coding  | 8                | 14                 |
| 5             | 16         | <i>Runx1</i>    | Non-coding  | 12               | 13                 |
| 6             | 16         | <i>Runx1</i>    | Non-coding  | 1                | 3                  |
| 7             | 16         | <i>Runx1</i>    | Non-coding  | 11               | 3                  |
| 8             | 16         | <i>Runx1</i>    | Non-coding  | 3                | 2                  |
| 9             | 6          | <i>Prickle2</i> | Exon 6      | 13               | 2                  |
| 10            | 7          | <i>Cckbr</i>    | Exon 2      | 1                | 1                  |
| 11            | 10         | <i>Fam19a2</i>  | Exon 3      | 1                | 1                  |
| 12            | 14         | <i>Pcdh8</i>    | Exon 2      | 1                | 1                  |
| 13            | 7          | <i>Slc17a7</i>  | Exon 2      | 1                | 1                  |
| 14            | 4          | <i>Elavl4</i>   | Exon 2      | 1                | 1                  |
| 15            | 9          | <i>Scn11a</i>   | Exon 3      | 1                | 1                  |
| 16            | 10         | <i>Trpm2</i>    | Exon 3      | 1                | 1                  |
| <b>Totals</b> | <b>7</b>   | <b>9</b>        |             | <b>74</b>        | <b>59</b>          |

**Supplementary Table 5 - All mapped deletion sequences  
Larger Deletions (LDs)**

| ID   | Site | Upstream<br>(retained) | Upstream<br>(lost) | Downstream<br>(lost) | Downstream<br>(retained) | MH<br>score MH | Notes      |
|------|------|------------------------|--------------------|----------------------|--------------------------|----------------|------------|
| LD1  | 1    | CGTGGCGAGG             | GCTGAGCTAT         | TGTTAGCACA           | GCTTCTCCAC               | 3 GCT          |            |
| LD2  | 1    | ACGTTATGAT             | AGTACGGAAA         | AGTCAGGCTC           | AGCCACCATG               | 2 AG           |            |
| LD3  | 1    | CAAAATGTCC             | TGCAGCCAGT         | TGTTCTGTAG           | CGTCAAACCTG              | 0 No_MH        | Ins CC     |
| LD4  | 1    | GAACCCTTGC             | ACAGGGAGGA         | AAAACCTTGAT          | ACAGCAACTC               | 4 ACAG         |            |
| LD5  | 1    | GTCCAAGGAA             | AGGACACGCG         | ATTTAGGCAG           | AGTCCTCCCT               | 2 AG           |            |
| LD6  | 1    | AGCCGAGACG             | CACATGACTA         | GTTCCTGGGC           | CACAAACATG               | 4 CACA         |            |
| LD7  | 1    | GGACGAATAT             | GAGGCTGGAG         | TGTACATATG           | GAGGTCAAAG               | 4 GAGG         |            |
| LD8  | 1    | CTTTCTCAGG             | TGGCCTGTCA         | ATGAGCCATT           | TGTATGCGTC               | 2 TG           |            |
| LD9  | 1    | GCCCTTTCCA             | GACCTGTCTC         | CTTTGTTTAC           | GGGACACCTG               | 1 G            |            |
| LD10 | 1    | ATCCAACGTG             | ATCTATAAAG         | CGCCTGCTGA           | ATCATCCTCT               | 3 ATC          |            |
| LD11 | 1    | GGTTCTGAAA             | ACATATTTGA         | CCGACTCCTC           | ACCGCACTGC               | 2 AC           |            |
| LD12 | 1    | AGCTCTAATG             | AGGAATAGCA         | AGTTAAGTTT           | TATTTGTAGC               | 0 No_MH        |            |
| LD13 | 2    | TGCAGGAGTA             | CCCTGAGATG         | GCACAGAGGC           | CCCTGCGATG               | 5 CCTG         |            |
| LD14 | 2    | GTGTACTTTT             | CAGAGAGCAA         | GTCCCTGCCC           | CAGAGTCCCC               | 5 CAGAG        |            |
| LD15 | 2    | CAACAACGTT             | AGCCACTCAG         | CCACCACCGA           | AGTCAGAGAG               | 2 AG           |            |
| LD16 | 2    | AGTCAGTCAG             | GGTGTAGTGT         | GCAGACCACT           | GGTGTCTGGT               | 5 GGTGT        | C to t mut |
| LD17 | 3    | TGTTAGCTTA             | CTTAGCAGTC         | ACTCTGGGGT           | CTGCTCATCT               | 2 CT           | C to t mut |
| LD18 | 3    | GGGGTCCAC              | GCTGCAGAGT         | CTCACAAAGT           | GCACAGACAC               | 2 GC           |            |
| LD19 | 3    | CAGAAGGCC              | TCGGCGATAA         | ACACATATAT           | ACACAGAAAC               | 0 No_MH        |            |
| LD20 | 4    | GGCCTTTCAC             | GGTCATGTCG         | TTCCCGAGTG           | GGCCCGACTT               | 2 GG           |            |
| LD21 | 4    | GGGCATTTTC             | GCCGAAGAGC         | GGTCTCTACT           | GTCGTGATCC               | 1 G            |            |
| LD22 | 4    | CCCCGCGGTG             | GCTGGTTTTT         | ACTTCTCTCT           | GCTTGCTTCA               | 3 GCT          |            |
| LD23 | 4    | AGCCTGGAAG             | TGAAAGTTGT         | AGCCCCGACA           | TGACCGTGAA               | 3 TGA          |            |
| LD24 | 4    | CAACTGCAAG             | GAGTTGGTCT         | GTAAAGCACT           | GACCATTTAT               | 2 GA           |            |
| LD25 | 4    | AATTTTATGA             | GGACAAAATG         | GACCATTCCC           | GGATGCCAGC               | 3 GGA          |            |
| LD26 | 4    | AAATAAATGG             | TCAGTGCTTT         | TTAGACCAAC           | TCCTTGCACT               | 2 TC           |            |
| LD27 | 4    | CAGGCAGACT             | CGCACTCTTC         | GCCCCGACGG           | CGCAGGATC                | 3 CGC          |            |
| LD28 | 5    | TAGGGCAGGG             | AGGCGGGCAG         | GTTTTTCATT           | GTATGGTTAT               | 0 No_MH        | Ins GGG    |
| LD29 | 5    | GGTCTCCATA             | GGGCAAGGCG         | TCATGTGATG           | GTTATCTCTG               | 1 G            |            |
| LD30 | 5    | CGTCTTTTAT             | GAAGCTTATT         | GATAGTCATG           | GAAGTCCAAG               | 4 GAAG         |            |
| LD31 | 5    | GGCCTTCCTT             | TCCTTACTTG         | AGCCTTCTGG           | TCCACTTCTG               | 3 TCC          |            |
| LD32 | 5    | TTCTTGGGAT             | CCCCAGGCAG         | GCGGGCAGAT           | GAAAGCTTTC               | 3 GAT          |            |
| LD33 | 5    | TCCCAAAATC             | GAGACTCTTA         | CAGATTCTCT           | GGACAGAAAG               | 1 G            |            |
| LD34 | 5    | CTGTGGGTGT             | GAGCTCTTCT         | AATTAATGTC           | GAGAGTGCTG               | 3 GAG          |            |
| LD35 | 5    | CTTCAGCCTT             | CCAGAAGTCA         | GTAAAGCCG            | CTCTCTAAG                | 1 C            | Ins T      |
| LD36 | 5    | TGGTGAATCC             | TGTGATGATA         | CACACACACG           | TGTGTGTATG               | 4 TGTG         |            |
| LD37 | 5    | GGTCTCCATA             | GGGCAAGGCG         | GCAGGGGTAT           | GGATGAATAC               | 2 GG           |            |
| LD38 | 5    | GGCTTACACT             | TCTGACACTG         | GTGATGATAG           | TCATGGAAAG               | 2 TC           |            |
| LD39 | 5    | GAAGTTTTGT             | GGAGAGCAAA         | ATCAGTCGCA           | GTCCCTGGCC               | 1 G            |            |
| LD40 | 6    | CACCTTCCCC             | AGCCCCAAGT         | GCCCCAAGTA           | AGCTGATCTG               | 3 AGC          |            |
| LD41 | 7    | GGTGGTCACT             | AGCTGTCTTC         | CCGCAAACAA           | AGGAAGCTTT               | 2 AG           |            |
| LD42 | 7    | AGGGGTTAAA             | ACCTAAGGGC         | CCAGGATATC           | ACCTCCATCT               | 4 ACCT         |            |
| LD43 | 7    | AGCGAGCAAG             | GGGATTCCGA         | ACCTAAGGGC           | GTTTTTCAGT               | 1 G            |            |
| LD44 | 7    | AAAGAACTTC             | ATACACTGGC         | ATCATCCAGG           | ATATCACCTC               | 3 ATA          |            |
| LD45 | 7    | AATCATGTGG             | GTTCCCACAG         | AATTCCAGGA           | GTGTTTATTA               | 2 GT           |            |
| LD46 | 7    | TCACTCTGCC             | CAGCACACCG         | CCTCCCCCTT           | CAGCGTTAGA               | 4 CAGC         |            |
| LD47 | 7    | AAGGGGGAGG             | TCGTGGGTCC         | ATCCCCCTGC           | TCGCTCGTTC               | 3 TCG          |            |
| LD48 | 7    | CTTCTTGCTG             | GTCTCAAGTT         | CACTGGCGTT           | GAAGCTGCAG               | 1 G            |            |
| LD49 | 7    | CAACTGAAAA             | CGCCCTTAGG         | TCATGATACT           | CGGGTTGATT               | 2 CG           |            |
| LD50 | 7    | AAAACGCTCT             | TAGGTTTTTAA        | AGGCCCGGTA           | GCTACTTATT               | 0 No_MH        | C to t mut |
| LD51 | 7    | CTAATCATGT             | GGGTTCCCAC         | ACCTGCTGGG           | GGGAGAGAT                | 3 GGG          |            |
| LD52 | 8    | TTCTTAAAGA             | AACCAGACTT         | AGTGTGTTGG           | AACCCCAGG                | 3 AAC          |            |
| LD53 | 8    | CAGAGAGGAG             | GGAGGGGGGA         | CTCTGTGAAA           | AGGTCAATAG               | 0 No_MH        | Ins AG     |
| LD54 | 8    | CAGCACCAAG             | CATTTGAAAAG        | CCAGACTTTC           | CTGGTGGTCT               | 1 C            |            |
| LD55 | 9    | GGGTCAATTA             | CCTTGAAAATG        | ACTCTCCAGC           | CCTTGCTAGA               | 5 CCTTG        |            |
| LD56 | 9    | GGAGAGTTGA             | GCACTTCAAC         | AGATGCTCTC           | GAGTTGTTCA               | 1 G            | Ins GAGT   |
| LD57 | 9    | GAACAGAGAG             | CATCTTTATA         | TCAGATCCAC           | CAGGACAAGG               | 2 CA           |            |
| LD58 | 9    | TATTTAAGAG             | TAAATGGGTT         | AGTCAATGGA           | TACCTATCTG               | 2 TA           |            |
| LD59 | 9    | TCTGTGAATT             | GGAGTCCCCT         | AGGAGAAGGA           | GGAGGAGTGG               | 4 GGAG         |            |
| LD60 | 9    | ATCCAGATAG             | GTATCCATTG         | GACCAGATTT           | GTTCACTTAT               | 2 GT           |            |
| LD61 | 9    | GAGCACTTCA             | ACCTTACCAT         | ATTACACAGT           | GAGCAGGGGC               | 0 No_MH        | Ins GA     |
| LD62 | 9    | TTTTTTTTTCC            | TAGAGAATCT         | TTAACATCAT           | TAGGAGAGGC               | 3 TAG          |            |

|      |    |             |            |            |             |         |              |
|------|----|-------------|------------|------------|-------------|---------|--------------|
| LD63 | 9  | AAC TGAACAA | ATCTGGTCAT | AACATCACCC | ATGCCCCAGT  | 2 AT    |              |
| LD64 | 9  | CGTATTGTGT  | ATATGTCTAT | ACATAAACCC | ATTTACTCTT  | 2 AT    |              |
| LD65 | 9  | CAAGCTTTCT  | GCTCTGGTGT | GTGGGCAGGG | GCTCTAACCT  | 5 GCTCT |              |
| LD66 | 9  | TGCTTCTAGT  | AGGGAAAAAT | AGGAGGGGTG | AGGTTAGCCG  | 3 AGG   |              |
| LD67 | 9  | AGGGCTGGAA  | GAGTTGAGCA | CCTTTCCTCT | ACCACACCCT  | 0 No_MH | Ins A        |
| LD68 | 10 | TTTTAGTTTT  | AGAGAACATA | GGGGAGGGCA | AGAGACCTGC  | 5 AGAGA |              |
| LD69 | 11 | GGGCTCAAGA  | CCGAGGTCCA | ATGCAAAGTT | CCTGCCTCT   | 2 CC    |              |
| LD70 | 12 | CAGGTCAGGA  | CTCTCCCGTC | ACGTTTATGT | TCCCGGATCA  | 0 No_MH | Ins A        |
| LD71 | 13 | ATGGAAACAC  | CATGTTTCCG | GAAAGTACAT | ATGCTTTCAT  | 0 No_MH |              |
| LD72 | 14 | AAGAAATGTGA | CTAAGTAAAG | AACAAGATGA | AAGGCAAGAT  | 3 TGA   | Ins A        |
| LD73 | 15 | AAGACAGACG  | GACACTCTGG | GTTCCAGTTT | GGAAAAACAGT | 1 G     | Ins GGAAAAAC |
| LD74 | 16 | AGTGGCTATC  | TTCAGGCTGT | GGATATGAGA | ACTATGAGTT  | 0 No_MH | Ins AC       |

### Expected size deletion sequences (EDs)

| ID   | Site | Upstream<br>(retained) | Upstream<br>(lost) | Downstream<br>(lost) | Downstream<br>(retained) | MH<br>score MH | Notes      |
|------|------|------------------------|--------------------|----------------------|--------------------------|----------------|------------|
| ED1  | 1    | GCCGAGACGC             | ACATGACTAA         | CTTTCCTTGG           | ACAGGGAGGG               | 3 ACA          |            |
| ED2  | 1    | CCGCAGCCGA             | GACGCACATG         | CCTTTCCTTG           | GACAGGGAGG               | 3 GAC          |            |
| ED3  | 1    | GACCGCAGCC             | GAGACGCACA         | CTTGACAGG            | GAGGGAGGGC               | 3 GAG          |            |
| ED4  | 1    | AGACGCACAT             | GACTAACCAA         | CCTTTCCTTG           | GACAGGGAGG               | 3 GAC          |            |
| ED5  | 1    | GACCGCAGCC             | GAGACGCACA         | GTCCCGCGT            | GTCTTTCCT                | 1 G            |            |
| ED6  | 2    | TACAAGTAA              | ACAAGCCAGC         | AGCAGCATCT           | ACCACAGAAA               | 2 AC           |            |
| ED7  | 2    | TGATACTTGG             | TTCAGAGAG          | AGTACACAAA           | TTATAGTACG               | 2 TT           |            |
| ED8  | 3    | AAGTAACACA             | AGCCAGCATG         | AATGCTTAGC           | AGCATCTACC               | 3 AGC          |            |
| ED9  | 3    | TGTTAAGAAG             | ATACAAGTAA         | AAGTACACAA           | ATTATAGTAC               | 2 AT           |            |
| ED10 | 3    | AACACAAGCC             | AGCATGAATC         | GAAAATGCTT           | AGCAGCATCT               | 4 AGCA         |            |
| ED11 | 3    | AGCCCTAGCA             | CTTCCATCT          | CGCCGAGGGC           | CTTCTGGATC               | 4 CTTC         |            |
| ED12 | 3    | CTAGCACTTC             | CCATCTTAGG         | TCGCCGAGGG           | CCTTCTGGAT               | 2 CC           |            |
| ED13 | 3    | ACAGCCCTAG             | CACTTCCCAT         | GAGGGCCTTC           | TGGATCCTGA               | 0 No_MH        |            |
| ED14 | 3    | CACTTCCCAT             | CTTAGGACTG         | ATGGCATCCC           | CTTTATCGCC               | 3 CTT          |            |
| ED15 | 3    | TTAGGACTGG             | TTGGTCTGTG         | GCATCCCCTT           | TATCGCCGAG               | 1 T            |            |
| ED16 | 4    | CATAGGGCAA             | GGCGGGCAGA         | GTGATGATAG           | TCATGGAAGT               | 0 No_MH        |            |
| ED17 | 4    | GGGTCTCCA              | TAGGGCAAGG         | GTGATGATAG           | TCATGGAAGT               | 1 T            |            |
| ED18 | 4    | TCCATAGGGC             | AAGGCGGGCA         | TGTGATGATA           | GTCATGGAAG               | 0 No_MH        |            |
| ED19 | 4    | TCCATAGGGC             | AAGGCGGGCA         | GTCATGGAAG           | TTCCAAGCAA               | 0 No_MH        |            |
| ED20 | 4    | TGGGGTCTC              | CATAGGGCAA         | TGATGATAGT           | CATGGAAGTC               | 3 CAT          |            |
| ED21 | 4    | CATAGGGCAA             | GGCGGGCAGA         | GTGATGATAG           | CTCATGGAAG               | 0 No_MH        | Ins C      |
| ED22 | 4    | CCATAGGGCA             | AGGCGGGCAG         | GTGATGATAG           | TCATGGAAGT               | 0 No_MH        |            |
| ED23 | 4    | CATAGGGCAA             | GGCGGGCAGA         | CTGTGATGAT           | AGTCATGGAA               | 0 No_MH        |            |
| ED24 | 4    | CTCCATAGGG             | CAAGGCGGGC         | TGATGATAGT           | CATGGAAGTC               | 2 CA           |            |
| ED25 | 4    | CCATAGGGCA             | AGGCGGGCAG         | TGATGATAGT           | CATGGAAGTC               | 0 No_MH        |            |
| ED26 | 4    | CATAGGGCAA             | GGCGGGCAGA         | GTGATGATAG           | TCATGGAAGT               | 0 No_MH        |            |
| ED27 | 4    | GGGGTCTCC              | ATAGGGCAAG         | GTGATGATAG           | TCATGGAAGT               | 0 No_MH        |            |
| ED28 | 4    | CATAGGGCAA             | GGCGGGCAGA         | TGATGATAGT           | CATGGAAGTC               | 0 No_MH        |            |
| ED29 | 5    | AGGCCTTTCA             | CGGTCATGTC         | CGCCCCGACG           | GCGCGAGGAT               | 0 No_MH        |            |
| ED30 | 5    | CAGGCCTTTC             | ACGGTCATGT         | CACGCCCCGA           | GCGGCGGAG                | 0 No_MH        | Ins G      |
| ED31 | 5    | GCAGGCCTTT             | CACGGTCATG         | CACGCCCCGA           | CGGCGGAGG                | 1 C            |            |
| ED32 | 5    | GGCAGGCCTT             | TCACGGTCAT         | CGACGGCGCG           | AGGATCAGTC               | 0 No_MH        |            |
| ED33 | 5    | CAGGCCTgTC             | ACGGTCATGT         | CACGCCCCGA           | CGGCGGAGG                | 0 No_MH        | T to g mut |
| ED34 | 5    | TTCACGGTCA             | TGTCGGGGCT         | GATCAGTCTC           | ACCTGGAGGT               | 0 No_MH        |            |
| ED35 | 5    | TTCACGGTCA             | TGTCGGGGCT         | CACCTGGAGG           | TCCTTAGGGT               | 1 T            |            |
| ED36 | 5    | AGGCCTTTCA             | CGGTCATGTC         | GCCCCGACGG           | CGCGAGGATC               | 2 CG           |            |
| ED37 | 5    | AGGCCTTTCA             | CGGTCATGTC         | CACGCCCCGA           | CGGCGGAGG                | 3 CGG          |            |
| ED38 | 5    | GCGGCATGGA             | GGATCAGGCA         | CCGACGGCGC           | GAGGATCAGT               | 1 G            |            |
| ED39 | 5    | AGGCCTTTCA             | CGGTCATGTC         | ACGCCCCGAC           | GCGCGAGGA                | 0 No_MH        |            |
| ED40 | 5    | CAGGCCTTTC             | ACGGTCATGT         | GCACGCCCCG           | ACGGCGGAG                | 4 ACGG         |            |
| ED41 | 5    | CAGGCCTTTC             | ACGGTCATGT         | CACGCCCCGA           | CGGCGGAGG                | 0 No_MH        |            |
| ED42 | 5    | GCCTTTCACG             | GTCATGTCGG         | CGCCCCGACG           | GCGCGAGGAT               | 3 ACG          |            |
| ED43 | 6    | CAGACACTCC             | TTTGCCTACA         | CTAGCCCCAAG          | GTAAGCTGAT               | 0 No_MH        |            |
| ED44 | 6    | CACTCCTTTG             | CCTACAAAAA         | CTAGCCCCAAG          | GTAAGCTGAT               | 1 G            |            |
| ED45 | 6    | ACACTCCTTT             | GCCTACAAAA         | CCTAGCCCCAA          | GGTAAGCTGA               | 1 G            |            |
| ED46 | 7    | TTAAAACCTA             | AGGGCGTTTT         | ACTAGGTCTC           | TGAGGGCAAG               | 0 No_MH        |            |
| ED47 | 7    | GTTAAAACCT             | AAGGGCGTTTT        | TAGGTCTCTG           | AGGGCAAGCT               | 1 A            |            |
| ED48 | 7    | TAAAACCTAA             | GGGCGTTTTT         | GACTAGGTCT           | CTGAGGGCAA               | 0 No_MH        |            |
| ED49 | 8    | ACCGCCCCCC             | ACTTCTTTGG         | AAGAAACCAG           | ACTTTCCTGG               | 4 ACTT         |            |
| ED50 | 8    | CCGCCCCCA              | CTTCTTTGGC         | GAAACCAGAC           | TTTCTGGTG                | 0 No_MH        |            |

|      |    |             |            |            |            |         |
|------|----|-------------|------------|------------|------------|---------|
| ED51 | 9  | AACCTCCCTAG | TAGCTAGCCG | GAGCCCCTGC | CCACGTGTGA | 0 No_MH |
| ED52 | 9  | TGTCCATATA  | ACTCCCTAGT | GCCCTGCCC  | ACGTGTGAAT | 2 AC    |
| ED53 | 10 | GACAAATACA  | TGGGGTTTTT | GACCCTAAAT | TGGAACTCCA | 3 TGG   |
| ED54 | 11 | ATAGAATACC  | CTCCTTCCAC | CCCAGCCTGT | CCGCAGAGCA | 1 C     |
| ED55 | 12 | CAGTCTTGGA  | GCCTTGCGGT | CCACGTTTAT | GTTCCCGGAT | 1 G     |
| ED56 | 13 | TTATGAATTC  | AAAACCAGTC | TGAGAGCGGA | AACATGGTGT | 2 AA    |
| ED57 | 14 | TATGAGATAG  | TTAATAAACA | GTGCCTGGTT | TTATGGGCAC | 3 TTA   |
| ED58 | 15 | CCTCTCACCA  | GCCCCTGTAG | GTCTGGCACT | GTGTGGGACT | 1 G     |
| ED59 | 16 | CTCAGTGGCT  | ATCTTCAGGC | GCCTTGCGA  | TAGGTCAGCC | 0 No_MH |

### Simulated larger deletion sequences

| ID    | Site | Upstream<br>(retained) | Upstream<br>(lost) | Downstream<br>(lost) | Downstream<br>(retained) | MH<br>score | MH    | Notes |
|-------|------|------------------------|--------------------|----------------------|--------------------------|-------------|-------|-------|
| Sim1  | n/a  | AATAGATCTT             | GCTGCATAAC         | AGAGGAGGTA           | CAGAGACAGT               | 0           | No_MH |       |
| Sim2  | n/a  | AAAGAGTTTTA            | TCTACAAAAT         | AATTAACAT            | CCTCTACCTT               | 0           | No_MH |       |
| Sim3  | n/a  | ATGACCTGGT             | GTTGCTGGAA         | TGATTACTGT           | AGCAGCTATG               | 2           | GT    |       |
| Sim4  | n/a  | CTGTGTCTGC             | AACCTATGCA         | AGCACTGCTC           | TAGATTGGAC               | 1           | C     |       |
| Sim5  | n/a  | AACCTATCA              | ATAAGCTATA         | AGTGACCCTG           | AGTTGTGTAA               | 1           | A     |       |
| Sim6  | n/a  | GGGACTTACA             | TATGGATATG         | TGGCTTGAGA           | CCTTCAGTAT               | 1           | A     |       |
| Sim7  | n/a  | ACTAGGTTTT             | CATTCTCCAT         | GCAGTGACTT           | AGATAGTTTA               | 2           | TT    |       |
| Sim8  | n/a  | CCCATCCCTT             | TTTAAGGAGA         | TAAAATCGAC           | TTCCAACCCA               | 2           | TT    |       |
| Sim9  | n/a  | AATAGAGATA             | GATGCATCAA         | AGAGTCGTTT           | CTTAAGGCTT               | 0           | No_MH |       |
| Sim10 | n/a  | ACCTTTGTGT             | AGTACCAAGG         | GACTTTTTTT           | CATGAAAATA               | 1           | T     |       |
| Sim11 | n/a  | TCCTCCTTCT             | TTTTCTTCTT         | ATATATATGT           | ACACTCTGTG               | 1           | T     |       |
| Sim12 | n/a  | GAGATTCAC              | CCCAGCAAGA         | ACAGGGCCTG           | CAGAAGGGTG               | 1           | C     |       |
| Sim13 | n/a  | ATTTGTATTT             | TATTAAGCAT         | ATATCATA             | CGTGAAAAAC               | 0           | No_MH |       |
| Sim14 | n/a  | TGGAAGCACA             | AGCCTCTCTC         | ACTACTTCGC           | TCCATTTATG               | 0           | No_MH |       |
| Sim15 | n/a  | CTGTACAGAT             | GGGAAAATGA         | CAGTGGGGAG           | TTCTGCATTT               | 0           | No_MH |       |
| Sim16 | n/a  | ACTAGACCAG             | ACCTTTTACA         | ATGGCAGCAG           | GTATCCTGGG               | 3           | CAG   |       |
| Sim17 | n/a  | AAAATTCAAC             | AATCCTTCAT         | AACAAAATAA           | TTAAGGGAAG               | 0           | No_MH |       |
| Sim18 | n/a  | AAGCCTGAGG             | AACAAAAGGA         | GCATGGCAGT           | AGGCAGACAG               | 1           | A     |       |
| Sim19 | n/a  | TGCTGTGATC             | ACAGATGAGA         | TGCTGAAGTT           | CACATCATTT               | 0           | No_MH |       |
| Sim20 | n/a  | AATTGAAAGC             | CCTGACTTCG         | CCTCCAGAGT           | ATTAGGATTA               | 0           | No_MH |       |
| Sim21 | n/a  | GTGCTAATAC             | AGTAATAAAA         | GGTGAGTTCC           | AGCATCCACT               | 2           | AG    |       |
| Sim22 | n/a  | TAATTGAATA             | TTCCCTATGG         | AAATAATGTT           | TGGTTGAAAT               | 1           | T     |       |
| Sim23 | n/a  | AGAAAACACT             | TCTGGAAATC         | AAATCCATAT           | GCAGAAGAAG               | 1           | T     |       |
| Sim24 | n/a  | GCATGCAGCA             | CTCATGAGCT         | TTCTGAGATA           | GCGGGCAAGT               | 1           | A     |       |
| Sim25 | n/a  | ATTGATTGTC             | CTCTCCTCAC         | ACGGAGGGTG           | ACCTTGAACT               | 0           | No_MH |       |
| Sim26 | n/a  | TGTGTTTGTT             | ATACTTGTAG         | CTTCTCATT            | CCATCCTTTG               | 2           | TT    |       |
| Sim27 | n/a  | TCGATTCTAG             | TTCATTCTAC         | AAAAAAGGTT           | TATTTTGTTT               | 1           | T     |       |
| Sim28 | n/a  | CAC TAGTGAA            | AACCAGAGTG         | TCCAGTAGAA           | AGCAGGGCA                | 3           | GAA   |       |
| Sim29 | n/a  | AACCAATTTA             | TAACCTCCCA         | GAGACCCCTG           | GCTCCAGCTG               | 0           | No_MH |       |
| Sim30 | n/a  | AAATTACGAG             | GGAAATTGGAA        | AATTAATATA           | AATAGCTTCT               | 0           | No_MH |       |
| Sim31 | n/a  | CAGATAAGTT             | CTAGCAGAAG         | GAGGAAACCA           | CAGAGCATGC               | 1           | C     |       |
| Sim32 | n/a  | CTGGGGTCCG             | AGGCGTGGGG         | TTCGAGGCAG           | GGTTTCTCTG               | 1           | G     |       |
| Sim33 | n/a  | TTCTTTCATT             | GGGTGATATT         | TGTACTCAAG           | TATGTAGCCA               | 0           | No_MH |       |
| Sim34 | n/a  | GGAGTATACT             | TTGGAAAAGG         | TCCTCCCAGA           | CACAGCTTAA               | 0           | No_MH |       |
| Sim35 | n/a  | TAAGAGAAAG             | TTGTCTCAAA         | GATTTGAATT           | TCTCTGATCA               | 1           | T     |       |
| Sim36 | n/a  | ATGGACTGGT             | GACAAGTGAT         | TACCCTCCCA           | AGACATTTCC               | 0           | No_MH |       |
| Sim37 | n/a  | ATACAGCCTC             | TTGTTTTGTA         | TAAAGTAGTG           | CTGGGCTGGT               | 0           | No_MH |       |
| Sim38 | n/a  | CGCAGTCTCG             | AGACCTGCGG         | CCACAAGTCC           | TGCCGGGAAG               | 0           | No_MH |       |
| Sim39 | n/a  | CTCTFCCCAG             | TGATGGCCGA         | CCCTAGCACA           | ACCTGCCCTG               | 0           | No_MH |       |
| Sim40 | n/a  | TTCTGATTAC             | AGTCCATCAC         | GTATCGTTT            | CCTTGATCTG               | 0           | No_MH |       |
| Sim41 | n/a  | ATGAAGGGAG             | AAGAAGATGG         | CTGCAGGACG           | TTGTAATTTG               | 1           | G     |       |
| Sim42 | n/a  | TACTATTGCA             | AGTGCCATCC         | AATGGTTGAT           | CCTAGTGAGG               | 0           | No_MH |       |
| Sim43 | n/a  | TTAAACTAAA             | TCAAGGGGTG         | AATATAAAAA           | CTTCATAATG               | 3           | AAA   |       |
| Sim44 | n/a  | AATTAAGCTT             | GGTCCATGCAT        | ACTGTGTAAA           | ACACTACACA               | 0           | No_MH |       |
| Sim45 | n/a  | TTATGGGATC             | AAGACTGATC         | TGGGAACAGA           | ATAATTGCTG               | 1           | A     |       |
| Sim46 | n/a  | AGCCTGGTCT             | ACAGAGTGAG         | TCCAGTCTCT           | CTCCTTCCCT               | 3           | TCT   |       |
| Sim47 | n/a  | TTGGAGGTCT             | GAAGAGCGCT         | GGTGTGGGCC           | ACCACATCCA               | 0           | No_MH |       |
| Sim48 | n/a  | AGAAAAAGTT             | CAAAC TAGAA        | TTATAGGAAT           | GAGCAACAAT               | 1           | T     |       |
| Sim49 | n/a  | AGTGTATGTF             | GACGTCAAGG         | TATCTTCCAG           | GTTCAAAAACA              | 1           | G     |       |
| Sim50 | n/a  | GTACAGATTG             | TACATTGTTT         | ATATTTTAAAG          | GTCATGTTGT               | 1           | G     |       |
| Sim51 | n/a  | AAAACAAATG             | TATAGATAAA         | TGCAGACACA           | GGAGCTATCT               | 0           | No_MH |       |
| Sim52 | n/a  | CACCTCTCAG             | ATATCTCCTG         | TATGGAGAGC           | TGTGGCCCTG               | 0           | No_MH |       |
| Sim53 | n/a  | AGGAAAAAGA             | AACAGTGATA         | TTCTCAATG            | GCTTCTTTCC               | 0           | No_MH |       |

|       |     |             |             |            |            |   |       |  |
|-------|-----|-------------|-------------|------------|------------|---|-------|--|
| Sim54 | n/a | CAGTGTTTTT  | TGTTTTTTTTG | ACCTTAAGGG | AGAGGGGAAA | 0 | No_MH |  |
| Sim55 | n/a | CTTCATCACT  | CCCAGGCTTA  | TAAAAACCTT | TTCACCAACT | 1 | T     |  |
| Sim56 | n/a | GCCCTAAGTA  | AAGAAGTTGC  | CTTAATTCTT | TTCAGACTCT | 0 | No_MH |  |
| Sim57 | n/a | GTACAATTTTC | CTTTTTCCCTC | AGATAGGACA | GTGTTCAAAC | 0 | No_MH |  |
| Sim58 | n/a | CCATCTGTGG  | CCAGCCAGGC  | TAGCCTAAGT | TTTACAGTCT | 0 | No_MH |  |
| Sim59 | n/a | CTTCCCCTTC  | TGTTTTCCCA  | TATCTGGTCG | CTTAGTGCTA | 0 | No_MH |  |
| Sim60 | n/a | TTGCAAAGGG  | AACAAGGATG  | CCAAGGATCA | TAGAAGCGAG | 0 | No_MH |  |
| Sim61 | n/a | CTAAACTGCA  | ACACCGGATA  | CTAACATGTT | GCTTGGTAGG | 0 | No_MH |  |
| Sim62 | n/a | CTCAGCACCT  | GACTCAGGGC  | AAAAATGGTG | CTTCTTTTGC | 0 | No_MH |  |
| Sim63 | n/a | CAAATCTCA   | AACATATTGA  | AAAGTATGAA | ATTGTAGAAA | 1 | A     |  |
| Sim64 | n/a | AAGTGGATTC  | TCACATTCA   | AGAACAGTTT | ATCCAGGGA  | 0 | No_MH |  |
| Sim65 | n/a | TTTTGTAAA   | GATATTTACT  | TGAGAATATC | ATCCGAGTG  | 0 | No_MH |  |
| Sim66 | n/a | AGAGACTCTGA | CAGGGTGGG   | CGGTTTTTTG | TTTGTTTGTA | 0 | No_MH |  |
| Sim67 | n/a | TGTGTTTGT   | CACACACATG  | GCATACTCTG | AAGAGCTCCG | 0 | No_MH |  |
| Sim68 | n/a | TGATCTGATG  | TAAGCCTCTG  | TGGAACAAAA | CATAGCAACC | 0 | No_MH |  |
| Sim69 | n/a | CTACCTCTGC  | CTCCCAGGCT  | CAGCCCCCTT | GTTTTAGAAT | 0 | No_MH |  |
| Sim70 | n/a | GATCTCATTA  | CGGATGGTTG  | GCTGTCTGG  | AACTCACTTT | 0 | No_MH |  |
| Sim71 | n/a | CCTCAACCCA  | AAATAAATG   | GGCACCATCT | CCACAGCAGT | 0 | No_MH |  |
| Sim72 | n/a | GATCTGCGAG  | AATAACTTAC  | AGAACAAATA | ACAGGGCTTT | 1 | A     |  |
| Sim73 | n/a | TTAGGTTCTG  | GCAGAGTCTT  | TGTATTTTTC | TTAGTTTCT  | 0 | No_MH |  |
| Sim74 | n/a | GCAAGTACAT  | ATCCCTCACA  | AGGGTAGGGG | GAGGGTATAG | 0 | No_MH |  |

### Larger deletion sequences from literature

| ID | Site           | Upstream (retained) | Upstream (lost) | Downstream (lost) | Downstream (retained) | MH score | MH        | Notes         |
|----|----------------|---------------------|-----------------|-------------------|-----------------------|----------|-----------|---------------|
| 1  | <i>Ngn3</i>    | CTCCGAGGAG          | GTAICTGACC      | CAAAGGGCAG        | GGGTCGGGGG            | 2        | AG        | Adikusuma '18 |
| 2  | <i>Ngn3</i>    | CCCAGCCCT           | GCCCTTTGTC      | GGCAGGGCAC        | GCTCCTGGCC            | 2        | GC        | Adikusuma '18 |
| 3  | <i>Ngn3</i>    | CGACCCCTGC          | CCTTTGTCCG      | CACGACTTGC        | ATGCAGCTCA            | 3        | TGC       | Adikusuma '18 |
| 4  | <i>Ngn3</i>    | CTGGATTCCG          | GACAAAGGGC      | CAGCTCTCCG        | CCACTATGGG            | 4        | TCCG      | Adikusuma '18 |
| 5  | <i>Ngn3</i>    | AGTCTGGATTC         | CGGACAAAGG      | CACCATAGTC        | CTCATCCGAG            | 2        | TC        | Adikusuma '18 |
| 6  | <i>Ngn3</i>    | AGGTGAGTCA          | GTGACAAGCA      | GCAGCACTCT        | GTTTGTTCCT            | 2        | GT        | Adikusuma '18 |
| 7  | <i>Ngn3</i>    | CTCCCAGACTC         | AAAAGAACAG      | GACAAAGGGC        | AGGGGGGAGC            | 1        | A         | Adikusuma '18 |
| 8  | <i>Ngn3</i>    | TTCGGAGCAG          | TGAGAGTGGG      | CAAAGGGCAG        | GGGTCGGGGG            | 4        | GCAG      | Adikusuma '18 |
| 1  | <i>Foxp4</i>   | AAGGGGTGAC          | CCGGCTTAGC      | CAGGGGTGAC        | AGGTGAGGGA            | 9        | AGGGGTGAC | Adikusuma '18 |
| 2  | <i>Foxp4</i>   | TCCCATTTGTC         | CTTGGGTTGC      | TCCAACCTGGA       | GATGGAGCCC            | 0        | No_MH     | Adikusuma '18 |
| 3  | <i>Foxp4</i>   | AGCCCCAGCG          | TTCCCATTGT      | GGGACTCCCC        | TTTCCATGGC            | 2        | TT        | Adikusuma '18 |
| 4  | <i>Foxp4</i>   | CCTGCAACCC          | AAGGACAATG      | TTTAGGCAAA        | ATAAGGCTCC            | 1        | A         | Adikusuma '18 |
| 5  | <i>Foxp4</i>   | CACAGGTGCC          | CTTTGGGTTT      | TCCCATTGTC        | CTTGGGTTGC            | 3        | CTT       | Adikusuma '18 |
| 6  | <i>Foxp4</i>   | GCTGTGAGAG          | GTGTGCCCTT      | TTGTCTTGC         | GTTGCAGGGG            | 2        | GT        | Adikusuma '18 |
| 7  | <i>Foxp4</i>   | CCCCTGCAAC          | CCAAGGACAA      | GACATTTAAC        | GACAGGGTGA            | 3        | AAC       | Adikusuma '18 |
| 1  | <i>Fzd3</i>    | ACACTAGCAC          | GTGCACCAAT      | AAAAGGGGAC        | AGTGTCAAAG            | 2        | AC        | Adikusuma '18 |
| 2  | <i>Fzd3</i>    | AGCTTAGCTT          | AAGGGTGTGA      | CAAACTTTTA        | AGAATTTGTT            | 1        | A         | Adikusuma '18 |
| 3  | <i>Fzd3</i>    | GGATAGAAAA          | TTCTATACTT      | AAGGGGACAG        | TGTCAAAGGC            | 1        | T         | Adikusuma '18 |
| 4  | <i>Fzd3</i>    | CTCTATCTAT          | CTATAACATA      | CAAATCTGTA        | CTCAGGAGAA            | 2        | CT        | Adikusuma '18 |
| 5  | <i>Fzd3</i>    | CCAAGCTTAG          | CAAGGGTGTG      | TATTCACCTT        | CATACGTCAA            | 2        | CA        | Adikusuma '18 |
| 6  | <i>Fzd3</i>    | TAGCAAGGGT          | GTGAAAAGGG      | TTTCTGGAAC        | AATAAAGCTT            | 0        | No_MH     | Adikusuma '18 |
| 7  | <i>Fzd3</i>    | TACTATATAT          | GGTATAACCC      | GTGTGAAAAG        | GGGACAGTGT            | 2        | GG        | Adikusuma '18 |
| 8  | <i>Fzd3</i>    | GCTTAGCAAG          | GGTGTGAAAA      | ACTCACTAAG        | TGTGAACCAA            | 3        | AAG       | Adikusuma '18 |
| 9  | <i>Fzd3</i>    | TCCAAGCTTA          | GCAAGGGTGT      | AAAATCTAAA        | ACTCTATTC             | 1        | A         | Adikusuma '18 |
| 10 | <i>Fzd3</i>    | CCGAGTATAG          | GAAGTTTACA      | GTGTGAAAAG        | GGGACAGTGT            | 2        | AG        | Adikusuma '18 |
| 1  | <i>Viperin</i> | CCCCGGACCT          | GTGGCTGTTT      | GAAAATGAAA        | GTTGGACCAG            | 2        | GT        | Adikusuma '18 |
| 2  | <i>Viperin</i> | TTAAAAATTG          | TTGAGTGTGC      | GAAGGAACAG        | CCACAGGTCC            | 1        | G         | Adikusuma '18 |
| 3  | <i>Viperin</i> | GGGTGGCTAG          | ATCCCAGGAA      | TCCAGGACAG        | TTGTGCATAG            | 2        | AG        | Adikusuma '18 |
| 4  | <i>Viperin</i> | TGGGTGTCTT          | CCGGCTCACC      | TGCTCTTTCC        | CCGCCACCC             | 3        | CCG       | Adikusuma '18 |
| 5  | <i>Viperin</i> | GGACCTGTGG          | CTGTTCTTTC      | AGCAGCCGAG        | CAGCTAGAGC            | 1        | C         | Adikusuma '18 |
| 6  | <i>Viperin</i> | CACCCCGGAC          | CTGTGGCTGT      | AAAGTTGGAC        | CAGAGCCAAG            | 4        | GGAC      | Adikusuma '18 |
| 7  | <i>Viperin</i> | GGGGCGTGGC          | TAGCTGGGCC      | TGGAACCTAC        | TCTTGTGGC             | 1        | T         | Adikusuma '18 |
| 8  | <i>Viperin</i> | CATAGACTTG          | CTGTACCCAG      | CGGGATCTAG        | CCACCTAAT             | 1        | C         | Adikusuma '18 |
| 9  | <i>Viperin</i> | CAGGTGTGTG          | CCTATCACCA      | CTATTCATCC        | TTGTGTTTGG            | 0        | No_MH     | Adikusuma '18 |
| 10 | <i>Viperin</i> | GGACCTGTGG          | CTGTTCTTTC      | AGCAGCTAGA        | GCAGTGGGCA            | 0        | No_MH     | Adikusuma '18 |
| 1  | <i>Pik3r6</i>  | GTGGAAGTGG          | GGAAGGTAAC      | ATTGCTCTGG        | AGGGCTGGGT            | 3        | TGG       | Adikusuma '18 |
| 2  | <i>Pik3r6</i>  | TTTGGAAGTG          | GAAGTGGGGA      | GATTGCTCTG        | GAGGGCTGGG            | 2        | GA        | Adikusuma '18 |
| 3  | <i>Pik3r6</i>  | ACGGGATAGG          | GGCTGGGGGA      | AATCCATCAG        | GAGTTGGCAA            | 1        | G         | Adikusuma '18 |
| 4  | <i>Pik3r6</i>  | CCCTGATTGC          | TCTGGAGGGC      | GGGCATATGC        | ACATGTATGT            | 3        | TGC       | Adikusuma '18 |

|   |               |             |            |            |            |   |        |               |
|---|---------------|-------------|------------|------------|------------|---|--------|---------------|
| 1 | <i>Hmgcs2</i> | TACTGTGCAG  | AATAAATTAA | GCCAGGGGAG | CAGGAGGGAT | 2 | AG     | Adikusuma '18 |
| 2 | <i>Hmgcs2</i> | TAAGAACCAG  | TACTTCTGTG | TGCTTTTTGA | CCAGTTACCT | 0 | No_MH  | Adikusuma '18 |
| 1 | <i>ApoE</i>   | CCAACCCTGG  | GAGCAGGCC  | GCCAGGTTGG | CCTTGAACCT | 3 | TGG    | Ma 2014       |
| 2 | <i>ApoE</i>   | TTGATGCTCA  | GAGGGTAAAG | CTGGGAGCAG | GCCCTGAACC | 1 | G      | Ma 2014       |
| 3 | <i>ApoE</i>   | CACGTAGAGT  | CCTGACCCAG | GCCCTGAACC | GCTTCTGGGA | 0 | No_MH  | Ma 2014       |
| 4 | <i>ApoE</i>   | CCTTAAACTT  | ACTACTCTAC | TGAACCGCTT | CTGGGATTAC | 3 | CTT    | Ma 2014       |
| 5 | <i>ApoE</i>   | TGACCCAGCC  | TTAAACTTAC | CTGAACCGCT | TCTGGGATTA | 1 | T      | Ma 2014       |
| 6 | <i>ApoE</i>   | CCCTGGGAGC  | AGGCCCTGAA | AGTGCTCAGC | GCTTCACCCT | 3 | AGC    | Ma 2014       |
| 1 | <i>Prf1</i>   | CACTGCCAGC  | GTAATGTGGC | CCAAGATAGC | CAATTTTGCA | 3 | AGC    | Ma 2014       |
| 1 | <i>B2m</i>    | GGAACAGAGG  | AACAGTTGTA | CAAGGACTGG | TCTTTCTACA | 2 | GG     | Ma 2014       |
| 2 | <i>B2m</i>    | GTAGGAAAAA  | CAGAAGTGT  | CTGTCTTCA  | GCAAGGACTG | 1 | A      | Ma 2014       |
| 3 | <i>B2m</i>    | AACTCCCCAA  | ATTCAAGTGT | CCGATCCGTA | GTGCCAGCAG | 1 | A      | Ma 2014       |
| 4 | <i>B2m</i>    | AACTCCCCA   | AATTCAAGTG | CCAAAACCG  | TCACCTGGGG | 0 | No_MH  | Ma 2014       |
| 1 | <i>Prkdc</i>  | CTGTCAGAA   | ACACCAAGGA | AGTACTGAGA | TTACAAATGT | 1 | A      | Ma 2014       |
| 2 | <i>Prkdc</i>  | TGTGATTCAT  | GGTGGCCCC  | TTCTTGTCT  | TTTTGATACA | 1 | T      | Ma 2014       |
| 3 | <i>Prkdc</i>  | TCAGTGAGT   | ACTATTTTAA | TGATTCATGG | TGGGCCCCAG | 0 | No_MH  | Ma 2014       |
| 1 | <i>B2m</i>    | TTCTAGTTCA  | TGAAACCAGA | CGCTCACAT  | TGAAATCCAA | 5 | TGAAA  | Zhou 2014     |
| 1 | <i>Prkdc</i>  | TGTGATTCAT  | GGTGGCCCC  | CTGAATTCAT | TTAAAGCACA | 6 | ATTCAT | Zhou 2014     |
| 2 | <i>Prkdc</i>  | TACGTCTCT   | ACTAAAGTTT | ACCAAGGACT | GAAGCTTGCA | 2 | CT     | Zhou 2014     |
| 1 | <i>Kcnk13</i> | CAACCCTCGC  | GGAGCTGTCC | CAACCTGAGC | CGTGAAGAGC | 2 | GC     | Mianne 2017   |
| 2 | <i>Kcnk13</i> | TGGGTGGCCG  | CGGTTGCGGC | TGCGCCCTCG | CTGGGACTTC | 2 | CG     | Mianne 2017   |
| 1 | <i>Tyr</i>    | AGTGCTCAGG  | CAACTTCATG | ATATCTCAGG | GCAGAAAATG | 6 | CTCAGG | Parikh 2015   |
| 2 | <i>Tyr</i>    | GACCTCAGTT  | CCCCTCAAA  | CACCAGGGTT | TCTGCCTTGG | 3 | GTT    | Parikh 2015   |
| 3 | <i>Tyr</i>    | TCAATTCAG   | ATAATCAAGG | AGGCAACTC  | ATGGGTTTCA | 2 | AT     | Parikh 2015   |
| 4 | <i>Tyr</i>    | CTCAGTTCCC  | CTTCAAAGGG | TCATCCCCAC | AGGCACCTAT | 1 | C      | Parikh 2015   |
| 5 | <i>Tyr</i>    | CTCAGTTCCC  | CTTCAAAGGG | GAAAATGTGC | CTTACTAACA | 3 | CTT    | Parikh 2015   |
| 6 | <i>Tyr</i>    | AACAGCTGGA  | GAGTATTTGA | CATAGAATCA | TTGACTTTGT | 1 | A      | Parikh 2015   |
| 1 | <i>Dip2a</i>  | CCCTCAGCC   | GCGCACGCGC | TGAGCCACCG | GCCATGGCCG | 2 | GC     | Zhang 2015    |
| 1 | <i>Tet1</i>   | AACATAATCCA | AACAAAGAGA | AGGAGACTCA | TGGAGACTAG | 2 | CA     | Wang 2013     |
| 1 | <i>Tet2</i>   | GTGCCAACAG  | ATATCCAGGC | TGCAATCCAG | GTACATGCCA | 3 | CAG    | Wang 2013     |

### Simulated larger deletion sequences (Supplementary Figure 5)

| ID    | Site | Upstream (retained) | Upstream (lost) | Downstream (lost) | Downstream (retained) | MH score | MH    | Notes |
|-------|------|---------------------|-----------------|-------------------|-----------------------|----------|-------|-------|
| Sim1  | n/a  | ATATGAAGGG          | ATAGCCGGTC      | TAGCCTAAGT        | TTTACAGTCT            | 0        | No_MH |       |
| Sim2  | n/a  | ATAGTGAATT          | TCCTAAATTA      | TATCTGGTCG        | CTTAGTGCTA            | 0        | No_MH |       |
| Sim3  | n/a  | CATGGTGCTG          | GAGAAGTAGC      | GGCTACACAG        | AGAAACCCTG            | 1        | G     |       |
| Sim4  | n/a  | CTTGCTTCAT          | TCTTGTGACG      | GTGTCTCCTG        | TCCCTCCTGT            | 2        | TC    |       |
| Sim5  | n/a  | GGGATCTTTG          | ACATGCCTGC      | TTGGGACTT         | GTTCAATCAC            | 0        | No_MH |       |
| Sim6  | n/a  | CCAGAATTAA          | TCATTTTGTG      | TCCTTTTGT         | TTGATTTCT             | 1        | T     |       |
| Sim7  | n/a  | AAGATGGAAG          | GAATATAGTG      | GAGCACTGCA        | TTTGTCAATG            | 0        | No_MH |       |
| Sim8  | n/a  | CAGAGGAAGT          | AAGCGAGATA      | TGTTCCCATC        | CCTGACTTGG            | 0        | No_MH |       |
| Sim9  | n/a  | TCTCACATAA          | GACTCTAAGC      | GGGACAGAGA        | GCCTAAGGGA            | 1        | G     |       |
| Sim10 | n/a  | ACAGCTGAGC          | TAAAGCAGAC      | TATTTCTCCT        | CCCAGCCCAA            | 0        | No_MH |       |
| Sim11 | n/a  | GCCATGCCCT          | TGAAAGCCAA      | TCCTATCCCT        | GCCTCAGCTG            | 4        | CCCT  |       |
| Sim12 | n/a  | ATTCTAGAT           | TTTCATATTC      | CAAGGACTTG        | TAATGTAAGT            | 1        | T     |       |
| Sim13 | n/a  | TGCCCTCTAT          | TCTGGCTTTT      | GGTGAGAAAT        | GGGCAGGGAG            | 2        | AT    |       |
| Sim14 | n/a  | CCCTGTGATG          | CAGTGACCAT      | AAAAACCCCA        | CTAGATCTAA            | 1        | C     |       |
| Sim15 | n/a  | AAATTGGTCT          | GAAGTTCTCT      | TATGGTCAAT        | TTTGAGAAG             | 1        | T     |       |
| Sim16 | n/a  | ATTGTACCTC          | ACACAATAAT      | AGTCTCCAG         | CCAAAAAAA             | 0        | No_MH |       |
| Sim17 | n/a  | AGTCCAGTAA          | CTCCTGCATC      | TCTCCGTAC         | ACTGTTACCA            | 0        | No_MH |       |
| Sim18 | n/a  | ACACCCGGCT          | CAAAACTTTT      | CTCAGTTTAG        | ACAGGTTGCT            | 0        | No_MH |       |
| Sim19 | n/a  | TTGTGAAAA           | TGCTGTCTTT      | TTGTCAAATG        | CTTTCTGTGC            | 0        | No_MH |       |
| Sim20 | n/a  | TTCTGGTTT           | CCCTCCGAAA      | CGGGGTGAGA        | TTAAGAATGT            | 0        | No_MH |       |
| Sim21 | n/a  | TCTCGAGGAA          | AGATGGGGCC      | CTGCTCTGAC        | ATGCATACAG            | 1        | A     |       |
| Sim22 | n/a  | GCCTACTTGT          | GTTTACTTCT      | AATAGATATC        | TCAGAAAGAG            | 0        | No_MH |       |
| Sim23 | n/a  | ACCTCAGCTA          | GTGACAGTTG      | GAGGTAAGCC        | AGGGCTGGGC            | 0        | No_MH |       |
| Sim24 | n/a  | CCCTGGCCCT          | AATCCTATGC      | AGAAATCAAC        | CTTGATATTG            | 0        | No_MH |       |
| Sim25 | n/a  | GCTCATCCTC          | TAACACACAA      | AACCAGTAGT        | CAGAGCTGGA            | 0        | No_MH |       |
| Sim26 | n/a  | TCCAGTTTCT          | TTGAGCTCTA      | GAAGGAATTT        | TAATCTTAGG            | 1        | T     |       |
| Sim27 | n/a  | CATCGTAAGA          | TCTCTTGTA       | AGGAGATGGT        | AACCTCATAC            | 0        | No_MH |       |
| Sim28 | n/a  | TTTTTTTTCA          | CTACAAAATG      | AGGGAGAGAG        | AATTTCTTAG            | 0        | No_MH |       |
| Sim29 | n/a  | TCAGGCCTTA          | AATACATTAT      | CAAGTTGATA        | TAGTACTTAT            | 2        | TA    |       |
| Sim30 | n/a  | CATGTGCCCA          | TGGGCGCACA      | AAGTGGTGGC        | AGGCAGCATC            | 0        | No_MH |       |



|       |     |            |            |            |             |         |
|-------|-----|------------|------------|------------|-------------|---------|
| Sim31 | n/a | GTATTTCTGT | AGACGTTTTA | CTATAAATTA | TATAGTACTG  | 0 No_MH |
| Sim32 | n/a | TCCAAGTGCC | TAGAACTACA | TGGGATTTTT | TTCTCCTTCA  | 1 T     |
| Sim33 | n/a | GTGGATCTCT | GTAAGTTTGA | TTTTGTTAAG | TTACACTATA  | 0 No_MH |
| Sim34 | n/a | CTCTCCAAAG | CTCTGAAGGA | TCCAAGAGGC | AGGGGCAGGT  | 0 No_MH |
| Sim35 | n/a | AGCCCCATC  | TTACAGATGG | CTGAGCCATT | TGCCAGCTAT  | 1 T     |
| Sim36 | n/a | GAGTTGGTGC | TCATTTTCCT | TCTTTACTCT | AACCCAGAGA  | 0 No_MH |
| Sim37 | n/a | GTGGATTATG | AAAATAGAAA | TGTGGAGTCT | GAACGGCGA   | 0 No_MH |
| Sim38 | n/a | CCACCGGACA | AAAGGCAGAA | GCGTAGCTAT | ACCCACAGCA  | 1 A     |
| Sim39 | n/a | CATCTTTTCC | CCATCCATTC | CATCCACAGT | AAAAGCCAAA  | 0 No_MH |
| Sim40 | n/a | CCATCCTTTC | AAAAAAAAAA | GTGTATGCTC | TTAACACTAG  | 2 TC    |
| Sim41 | n/a | ACCCATTAGA | CCCAGAATGC | AGATTGATGA | CTCAGCAGTT  | 2 GA    |
| Sim42 | n/a | ATTATCTTCC | TCTCGCCCTT | CAGAGAGCTA | CCTGTCTCTT  | 0 No_MH |
| Sim43 | n/a | TTATTTTCTT | CATTCTTTGT | GGTGCCATTC | TCTTCTGGAA  | 0 No_MH |
| Sim44 | n/a | ATAATCCAGC | AACATGAGTG | GGTGTGAGA  | AGGACTGGTA  | 1 A     |
| Sim45 | n/a | CCAGCTAGCT | TCCCTGCTGA | TTCAGTTCAA | GTTAGTTTCA  | 0 No_MH |
| Sim46 | n/a | GGAGATGGAA | TTTTTGCCAA | GTGTAGGAG  | TGGATGGGGA  | 1 T     |
| Sim47 | n/a | GGATCCCATG | AGAGGCTTCA | CTGGAATTCA | AGCAGTTGCA  | 2 AG    |
| Sim48 | n/a | GAAGGGTATG | AAAGAACCTG | CTGCTGGGTG | GCCAAAGTTA  | 2 TG    |
| Sim49 | n/a | CAGGGCATGT | CCTCCATCAC | GCCGTCCTGT | TCTTAGCCAC  | 3 TGT   |
| Sim50 | n/a | GTTAAAGATT | TATTTATTTA | TGAAAAGCA  | TTATTTCAAA  | 1 T     |
| Sim51 | n/a | GATTGGTTCC | TAACATCCAC | TGGTCCTCTG | GAGTCTAACT  | 0 No_MH |
| Sim52 | n/a | ATCTCGTCC  | AGAATAACCT | AGCAGCTATG | GAATTAGCCG  | 0 No_MH |
| Sim53 | n/a | AAATGGAAGA | GAGAATTTCA | TTCCAACCCA | AAGTTATCAA  | 1 A     |
| Sim54 | n/a | AAGAAAATAC | AAAGGAGGCA | CTTAAGGCTT | TGTTCTCTACA | 0 No_MH |
| Sim55 | n/a | CTTTGGGGTC | CTTGAGCCAG | GTATCCTGGG | AAGTCCATGC  | 0 No_MH |
| Sim56 | n/a | TACATGGGCA | CAGGGGAAAA | TTAAGGGAAG | TAGAGGGTGG  | 0 No_MH |
| Sim57 | n/a | AACTTAAGGG | ACGTGGAAAA | ACCTTGAACT | TGTGTTCCCTG | 0 No_MH |
| Sim58 | n/a | ATGGAATACC | ACTCAGCTAT | AGACAGGGCA | TCAAGTGGAT  | 0 No_MH |
| Sim59 | n/a | GCTTTTAGGT | ATATTTTTGT | GCTCCAGCTG | GATATGTAGC  | 0 No_MH |
| Sim60 | n/a | TTAAATCATC | ACCCTACCCT | GGTTTCTCTG | TATAGCCCTG  | 0 No_MH |
| Sim61 | n/a | TTCATTTCCA | GAGCACTTTG | AGACATTTCC | TTTTGTTCCTC | 0 No_MH |
| Sim62 | n/a | TACAGCACTC | CCATCCCCGC | TGCCGGGAAG | GGGAATGCT   | 0 No_MH |
| Sim63 | n/a | GATACACAAA | GCTTCATCTG | ACCTGCCCTG | CGCACATACT  | 0 No_MH |
| Sim64 | n/a | ATATCAAAGC | CACTGACTTA | CAAGCCCCCA | GGACACAAGA  | 0 No_MH |
| Sim65 | n/a | TTAACAGTAC | TACTGATTCC | AACAGCATGC | ACAAGACCTG  | 1 C     |
| Sim66 | n/a | CTCCAGCCCC | CTGGTGAATT | AGGCAGCAGG | ATCAGGAGTT  | 0 No_MH |
| Sim67 | n/a | CCCCTCACTG | GGGGATTCTA | TCAGAGTGAG | ACACCCTGTC  | 1 G     |
| Sim68 | n/a | TGCCCATTGA | CACTACTCTG | TAAGTTGCTG | AGTGGGTCCT  | 0 No_MH |
| Sim69 | n/a | CCAGCCCTGA | AGGAATTTTT | AACTAGGAAG | AGGTTAAGTT  | 3 AGG   |
